# Supplementary material for: Posttranscriptional Upregulation of IDH1 by HuR Establishes a Powerful Survival Phenotype in Pancreatic Cancer Cells
Source: Oxford University Press journal article supplement (doi:10.1158/0008-5472.can-17-0015), 2017-06-26
Supplement: 00085472can170015-sup-176875_2_unknown_upload_4010093_pp59xp.xlsx [file 00085472can170015-sup-176875_2_unknown_upload_4010093_pp59xp.xlsx]

## Sheet: Sheet1
Table S3.FPKM values for all genes identified through RNA-sequencing
Ensemble Gene ID	GeneName	HS.HuR(+/+).1	HS.HuR(+/+).2	HS.HuR(+/+).3	HS.HuR(-/-).1	HS.HuR(-/-).2	HS.HuR(-/-).3	Mia.HuR(+/+).1	Mia.HuR(+/+).2	Mia.HuR(+/+).3	Mia.HuR(-/-).1	Mia.HuR(-/-).2	Mia.HuR(-/-).3
ENSG00000254144	7SK	0	2	1	2	2	5	0	1	0	0	0	1
ENSG00000260682	7SK	2	1	2	2	0	0	1	1	1	0	0	1
ENSG00000121410	A1BG	1	0	0	1	0	0	6	0	2	0	0	0
ENSG00000268895	A1BG-AS1	13	12	15	7	14	8	47	61	65	42	44	42
ENSG00000148584	A1CF	4	1	8	0	1	1	1	1	0	0	0	0
ENSG00000175899	A2M	10	5	4	4	3	3	0	0	0	0	0	1
ENSG00000166535	A2ML1	0	0	0	0	0	0	1	0	1	0	0	0
ENSG00000256661	A2ML1-AS1	3	1	1	0	1	1	1	0	2	0	0	1
ENSG00000256069	A2MP1	0	0	1	0	0	0	0	0	0	0	0	0
ENSG00000184389	A3GALT2	0	0	0	0	0	0	0	1	0	0	0	0
ENSG00000128274	A4GALT	2	1	4	3	2	2	2	1	0	1	0	0
ENSG00000118017	A4GNT	2	4	0	3	2	0	1	1	0	0	1	0
ENSG00000094914	AAAS	10	10	6	17	10	15	12	14	20	12	9	5
ENSG00000081760	AACS	24	31	39	65	55	52	30	32	31	10	14	19
ENSG00000109576	AADAT	6	5	5	17	11	6	2	2	4	2	1	2
ENSG00000158122	AAED1	22	14	24	40	23	25	21	20	19	10	21	12
ENSG00000103591	AAGAB	51	53	95	106	87	86	70	72	79	33	58	45
ENSG00000115977	AAK1	10	4	4	10	3	3	36	34	6	10	7	14
ENSG00000087884	AAMDC	6	6	12	4	2	5	4	6	3	0	5	2
ENSG00000127837	AAMP	65	54	82	158	118	104	79	82	88	58	39	56
ENSG00000129673	AANAT	1	5	1	0	0	0	2	3	3	3	2	2
ENSG00000131043	AAR2	12	7	10	13	10	9	27	23	28	10	16	8
ENSG00000090861	AARS	345	311	403	195	92	89	848	664	584	290	263	350
ENSG00000124608	AARS2	19	12	24	28	23	21	17	18	26	7	17	15
ENSG00000266967	AARSD1	23	15	23	27	17	13	15	11	24	14	14	4
ENSG00000157426	AASDH	16	21	21	15	15	8	22	31	25	11	13	15
ENSG00000149313	AASDHPPT	74	44	100	108	80	70	78	71	69	24	34	47
ENSG00000008311	AASS	27	22	19	46	29	31	4	3	5	4	1	3
ENSG00000108270	AATF	111	97	126	161	99	98	151	144	192	92	77	92
ENSG00000181409	AATK	14	17	10	8	9	2	84	82	70	96	82	77
ENSG00000225180	AATK-AS1	1	0	1	0	0	0	4	2	0	1	0	0
ENSG00000225200	AB019441.29	0	0	1	0	0	0	0	1	1	0	1	0
ENSG00000183044	ABAT	3	2	7	4	4	6	8	5	2	5	5	12
ENSG00000226210	ABC7-42389800N19.1	14	4	13	5	1	3	0	0	0	0	0	3
ENSG00000271153	ABC7-43041300I9.1	0	0	0	0	0	0	2	0	2	0	0	2
ENSG00000165029	ABCA1	8	10	20	11	7	6	8	9	2	2	8	7
ENSG00000154263	ABCA10	4	7	7	3	3	0	0	1	2	0	0	0
ENSG00000251595	ABCA11P	7	1	6	2	2	4	2	4	0	4	1	0
ENSG00000144452	ABCA12	4	0	2	0	0	0	0	0	0	2	0	0
ENSG00000179869	ABCA13	0	0	0	1	0	0	0	0	0	0	0	0
ENSG00000238098	ABCA17P	15	20	10	2	2	3	14	14	5	4	1	3
ENSG00000107331	ABCA2	29	19	37	38	34	23	12	11	20	5	8	7
ENSG00000167972	ABCA3	21	40	30	107	77	77	19	16	34	6	6	8
ENSG00000154265	ABCA5	12	12	18	11	16	7	12	8	5	3	4	6
ENSG00000154262	ABCA6	0	2	1	0	0	0	0	0	0	0	0	0
ENSG00000064687	ABCA7	16	15	17	30	29	22	14	9	10	10	10	15
ENSG00000141338	ABCA8	0	0	0	0	0	0	0	2	0	0	0	0
ENSG00000154258	ABCA9	0	0	1	0	0	0	0	0	0	0	0	0
ENSG00000135776	ABCB10	15	12	20	23	20	11	25	23	43	16	19	20
ENSG00000005471	ABCB4	0	0	0	0	0	0	1	0	0	0	0	0
ENSG00000115657	ABCB6	14	7	22	18	19	6	6	29	1	5	6	3
ENSG00000131269	ABCB7	33	30	27	59	18	31	40	27	52	13	23	24
ENSG00000197150	ABCB8	16	9	17	33	11	16	31	30	24	26	28	29
ENSG00000150967	ABCB9	849	799	777	628	572	554	429	450	408	339	308	323
ENSG00000103222	ABCC1	18	14	32	37	16	23	23	23	24	18	16	14
ENSG00000124574	ABCC10	15	11	11	24	11	10	11	3	5	5	2	3
ENSG00000121270	ABCC11	170	182	174	199	184	207	329	319	411	253	213	249
ENSG00000023839	ABCC2	0	0	1	0	2	0	272	190	200	95	113	150
ENSG00000108846	ABCC3	12	14	23	20	12	10	20	25	32	8	13	10
ENSG00000125257	ABCC4	42	38	58	90	60	45	68	54	66	22	39	25
ENSG00000114770	ABCC5	6	12	12	24	17	25	54	24	60	29	23	29
ENSG00000223882	ABCC5-AS1	0	0	0	1	0	0	1	1	0	0	0	0
ENSG00000091262	ABCC6	2	2	1	5	2	5	2	3	2	7	2	1
ENSG00000256340	ABCC6P1	0	0	1	1	0	0	0	0	0	0	0	0
ENSG00000101986	ABCD1	11	7	7	40	18	29	15	9	12	2	1	3
ENSG00000117528	ABCD3	102	80	140	166	116	124	69	77	81	15	20	23
ENSG00000119688	ABCD4	13	18	19	26	10	6	24	23	11	9	8	13
ENSG00000164163	ABCE1	224	171	286	393	351	351	242	265	297	94	149	129
ENSG00000204574	ABCF1	57	54	75	274	232	237	205	190	231	174	152	156
ENSG00000033050	ABCF2	113	96	122	229	179	166	227	180	215	137	135	183
ENSG00000161204	ABCF3	17	23	40	43	35	34	58	34	71	23	25	31
ENSG00000160179	ABCG1	4	1	6	2	2	0	9	8	2	0	1	0
ENSG00000118777	ABCG2	3	1	1	1	1	4	2	1	1	0	2	1
ENSG00000172350	ABCG4	0	0	0	0	1	0	0	0	0	0	0	0
ENSG00000138075	ABCG5	1	0	0	0	0	0	2	0	2	0	0	1
ENSG00000143921	ABCG8	0	0	0	0	0	0	0	0	0	1	0	0
ENSG00000143994	ABHD1	12	11	10	5	5	3	11	8	3	11	6	3
ENSG00000144827	ABHD10	72	41	72	76	39	42	57	63	92	21	49	58
ENSG00000106077	ABHD11	6	3	9	12	20	17	46	41	58	29	32	33
ENSG00000100997	ABHD12	26	25	37	44	31	16	40	39	34	17	19	22
ENSG00000131969	ABHD12B	6	4	4	2	4	3	3	3	5	1	1	2
ENSG00000139826	ABHD13	20	11	21	19	15	18	16	25	24	9	11	13
ENSG00000248487	ABHD14A	51	40	45	31	21	25	96	100	112	50	56	71
ENSG00000114786	ABHD14A-ACY1	0	0	0	0	0	0	0	1	0	2	0	0
ENSG00000114779	ABHD14B	6	9	7	3	2	4	31	21	30	6	13	12
ENSG00000168792	ABHD15	41	42	31	67	50	60	13	3	10	3	3	3
ENSG00000204427	ABHD16A	17	14	20	25	20	11	23	29	35	11	9	14
ENSG00000183260	ABHD16B	192	229	178	186	218	217	650	496	415	222	202	198
ENSG00000129968	ABHD17A	21	17	16	39	33	23	34	31	34	27	28	26
ENSG00000198658	ABHD17AP2	0	0	0	3	1	1	1	1	2	3	2	1
ENSG00000250536	ABHD17AP3	2	3	1	3	2	2	3	9	11	4	6	8
ENSG00000107362	ABHD17B	20	8	24	10	4	11	27	37	22	4	3	12
ENSG00000136379	ABHD17C	4	4	4	10	8	8	3	4	5	0	4	2
ENSG00000140526	ABHD2	128	97	114	176	144	147	157	138	162	86	115	156
ENSG00000158201	ABHD3	22	15	33	40	26	17	32	40	13	7	9	17
ENSG00000100439	ABHD4	7	3	4	13	7	3	11	8	4	2	2	10
ENSG00000011198	ABHD5	7	3	7	78	59	76	10	9	13	3	6	7
ENSG00000163686	ABHD6	6	4	6	14	8	9	8	8	13	8	5	4
ENSG00000127220	ABHD8	4	12	6	7	9	9	66	91	95	121	80	87
ENSG00000136754	ABI1	72	32	86	77	43	66	73	91	101	47	48	41
ENSG00000138443	ABI2	256	259	488	172	116	120	2844	2810	2173	1159	1305	1448
ENSG00000108798	ABI3	0	0	0	0	1	0	0	0	0	0	0	0
ENSG00000154175	ABI3BP	13	7	7	9	3	3	19	2	7	0	7	2
ENSG00000097007	ABL1	38	33	49	81	66	51	67	61	84	48	41	49
ENSG00000143322	ABL2	57	62	121	400	270	221	50	54	52	44	31	47
ENSG00000099204	ABLIM1	31	24	43	42	25	31	8	8	17	7	6	15
ENSG00000163995	ABLIM2	1	0	0	2	1	0	5	2	1	0	1	0
ENSG00000173210	ABLIM3	1	2	3	51	28	26	0	0	0	0	0	1
ENSG00000175164	ABO	0	0	0	0	0	0	1	0	0	0	0	0
ENSG00000159842	ABR	81	75	94	94	68	87	94	85	93	74	90	80
ENSG00000174429	ABRA	2	0	1	0	0	0	0	0	0	0	0	0
ENSG00000146386	ABRACL	33	24	43	54	53	41	18	16	12	6	11	9
ENSG00000146109	ABT1	21	19	26	28	21	21	19	28	27	24	24	21
ENSG00000250496	ABT1P1	0	0	0	0	0	0	1	1	0	0	1	0
ENSG00000114626	ABTB1	3	6	7	5	4	1	7	5	3	9	1	1
ENSG00000166016	ABTB2	9	12	20	19	15	11	15	14	21	10	14	11
ENSG00000260246	AC000032.2	43	32	36	13	15	23	156	136	169	77	104	109
ENSG00000225929	AC000036.4	1	0	0	0	0	0	0	0	0	1	0	0
ENSG00000242156	AC000041.8	4	4	9	12	13	8	5	7	9	4	6	2
ENSG00000273212	AC000068.10	0	1	1	1	0	1	0	1	0	1	2	0
ENSG00000185065	AC000068.5	9	11	15	20	32	18	15	10	17	5	12	7
ENSG00000273300	AC000068.9	5	7	4	13	18	13	13	12	5	21	18	22
ENSG00000232926	AC000078.5	4	7	7	4	1	0	3	4	2	1	1	2
ENSG00000235776	AC000089.3	1	0	0	2	1	0	0	4	1	0	1	2
ENSG00000270393	AC000095.9	0	0	0	0	0	0	1	5	4	0	0	2
ENSG00000236340	AC000099.1	1	0	0	0	2	1	0	0	0	0	0	0
ENSG00000236105	AC000110.1	0	0	0	0	0	0	0	0	0	0	1	0
ENSG00000243107	AC000120.7	0	0	0	1	0	0	0	0	0	0	0	0
ENSG00000224138	AC000123.4	0	1	1	1	1	4	1	1	6	1	0	0
ENSG00000226770	AC000124.1	1	0	0	0	0	0	0	0	0	0	0	0
ENSG00000227249	AC000374.1	1	1	0	0	0	0	0	0	0	0	0	0
ENSG00000184319	AC002055.4	5	6	8	8	7	8	2	6	0	3	1	2
ENSG00000213683	AC002056.3	0	0	0	0	0	0	0	1	0	0	0	0
ENSG00000273216	AC002059.10	1	0	0	0	0	0	1	0	0	0	0	0
ENSG00000267698	AC002116.7	3	0	0	1	0	0	0	0	0	0	0	0
ENSG00000248101	AC002116.8	0	0	0	0	0	1	0	0	5	0	0	0
ENSG00000224505	AC002117.1	93	55	104	30	52	22	105	102	150	17	33	52
ENSG00000271366	AC002128.5	7	3	3	3	3	2	0	0	0	0	0	0
ENSG00000259242	AC002306.1	0	1	0	1	0	0	1	3	1	0	1	0
ENSG00000260494	AC002310.10	2	1	1	1	1	3	1	3	0	2	3	2
ENSG00000235560	AC002310.12	17	11	12	16	19	14	11	15	14	6	6	5
ENSG00000260869	AC002310.13	0	0	0	0	0	0	0	1	0	0	1	0
ENSG00000261588	AC002310.17	2	4	7	3	2	2	3	1	0	0	0	1
ENSG00000239791	AC002310.7	192	203	206	119	92	126	0	0	0	0	0	1
ENSG00000267439	AC002398.11	49	67	51	45	47	52	71	69	70	69	49	67
ENSG00000267328	AC002398.12	0	0	0	0	0	0	0	0	1	1	0	1
ENSG00000267049	AC002398.13	3	0	3	4	3	1	1	7	3	1	1	1
ENSG00000225872	AC002398.5	0	0	0	0	0	0	1	1	1	0	0	1
ENSG00000188223	AC002398.9	2	6	0	0	0	0	4	4	6	3	1	0
ENSG00000261528	AC002400.1	1	3	0	1	2	1	2	2	1	4	1	5
ENSG00000236472	AC002401.1	1	1	1	1	2	0	1	4	2	1	0	2
ENSG00000236197	AC002429.5	0	2	2	0	4	4	0	0	0	0	0	0
ENSG00000269449	AC002451.1	0	0	0	1	0	1	0	2	1	0	0	1
ENSG00000231170	AC002451.3	0	0	1	0	0	0	0	0	0	0	0	0
ENSG00000237819	AC002454.1	1	0	0	0	0	0	0	0	0	0	0	0
ENSG00000223969	AC002456.2	0	0	0	0	0	0	0	0	0	0	0	1
ENSG00000241764	AC002467.7	2	1	4	5	1	0	0	3	5	1	1	0
ENSG00000238033	AC002480.2	0	0	0	0	0	0	1	0	0	0	0	0
ENSG00000235945	AC002543.2	6	5	9	1	1	9	6	4	4	5	8	5
ENSG00000261312	AC002550.5	448	427	375	404	473	446	242	280	387	410	425	472
ENSG00000233979	AC002553.4	0	0	0	1	0	0	0	0	0	0	1	0
ENSG00000267005	AC002984.2	0	0	0	1	1	0	0	0	0	0	0	0
ENSG00000268193	AC002985.3	0	3	0	0	0	0	0	0	0	0	0	0
ENSG00000196861	AC002994.1	0	0	0	1	0	0	0	0	0	0	0	0
ENSG00000269533	AC003002.6	0	0	0	0	0	0	0	1	0	0	0	2
ENSG00000269026	AC003006.7	0	0	0	0	1	0	0	2	3	1	0	0
ENSG00000237773	AC003075.4	22	36	16	33	20	25	14	14	17	21	18	18
ENSG00000203505	AC003079.1	0	0	0	0	0	0	0	0	0	0	1	0
ENSG00000236453	AC003092.1	0	0	0	2	2	1	0	0	0	0	0	0
ENSG00000236938	AC003092.2	0	0	0	0	1	0	0	0	0	0	0	0
ENSG00000267750	AC003102.3	0	1	1	0	0	1	0	0	3	3	1	0
ENSG00000234494	AC003665.1	10	14	7	7	9	5	6	9	20	17	14	17
ENSG00000269097	AC003682.17	0	0	0	0	0	0	0	0	0	0	2	0
ENSG00000234859	AC003958.2	0	0	0	1	1	0	1	0	0	0	0	0
ENSG00000235139	AC003984.1	0	0	0	0	0	0	2	5	1	5	2	2
ENSG00000243621	AC003989.3	0	0	0	1	0	0	0	0	0	0	0	0
ENSG00000227948	AC003989.4	0	3	1	1	2	3	1	1	1	1	0	1
ENSG00000268948	AC004017.1	0	0	0	0	0	0	0	1	0	0	0	0
ENSG00000236754	AC004019.13	0	0	0	0	0	0	2	0	0	1	0	0
ENSG00000272675	AC004019.18	0	0	0	0	0	0	4	0	0	0	0	0
ENSG00000228751	AC004022.8	0	0	0	0	0	0	1	0	0	0	0	0
ENSG00000223442	AC004041.2	14	10	14	7	9	13	36	32	50	36	33	38
ENSG00000196656	AC004057.1	162	153	201	217	133	159	219	145	234	146	117	154
ENSG00000273447	AC004067.5	4	1	2	3	2	2	3	0	1	1	1	1
ENSG00000251473	AC004069.1	0	0	0	0	1	0	0	0	0	0	0	0
ENSG00000251259	AC004069.2	0	0	0	0	0	0	1	1	0	0	0	0
ENSG00000268163	AC004076.9	0	0	0	3	0	0	0	0	0	0	0	0
ENSG00000260264	AC004125.3	0	1	0	0	0	0	0	0	0	0	0	0
ENSG00000213798	AC004129.9	0	0	0	1	1	0	0	0	0	0	0	0
ENSG00000267666	AC004156.3	0	0	1	0	0	1	0	1	0	0	0	0
ENSG00000261008	AC004158.2	0	1	0	0	0	0	0	2	4	0	0	3
ENSG00000260664	AC004158.3	18	20	25	11	7	4	19	15	18	23	29	20
ENSG00000184616	AC004166.6	15	10	6	1	7	4	3	5	17	6	5	4
ENSG00000267778	AC004221.2	4	4	1	6	0	0	1	1	2	2	0	4
ENSG00000234477	AC004231.2	0	1	0	0	0	0	0	0	0	0	0	0
ENSG00000230612	AC004237.1	0	0	0	0	0	2	0	3	0	1	0	0
ENSG00000005189	AC004381.6	2	7	9	8	6	5	14	8	12	4	5	3
ENSG00000269131	AC004447.2	617	699	625	1351	1317	1185	943	867	1222	1212	1217	1452
ENSG00000235979	AC004448.5	0	0	1	0	0	0	1	0	0	0	0	0
ENSG00000261204	AC004449.6	0	2	0	4	4	4	16	15	23	7	4	7
ENSG00000146677	AC004453.8	2	0	0	2	0	0	1	2	2	3	2	1
ENSG00000237347	AC004461.4	0	0	0	1	0	0	0	0	0	0	0	1
ENSG00000260924	AC004463.6	2	0	2	0	2	1	5	7	6	4	9	15
ENSG00000268069	AC004466.1	38	22	21	23	34	35	13	14	12	13	20	21
ENSG00000272682	AC004471.10	0	0	0	1	0	2	4	4	2	0	2	4
ENSG00000223461	AC004471.9	7	8	3	8	3	8	37	25	21	43	43	50
ENSG00000267122	AC004490.1	26	28	22	20	33	14	24	24	25	25	30	26
ENSG00000267308	AC004510.3	78	53	71	150	148	99	92	86	115	106	101	118
ENSG00000266990	AC004528.4	0	0	0	0	0	0	0	0	0	0	0	1
ENSG00000225792	AC004540.4	2	4	6	3	3	6	2	1	0	1	1	1
ENSG00000214870	AC004540.5	0	1	0	0	0	0	1	0	0	1	0	0
ENSG00000229893	AC004549.6	9	12	8	6	4	3	8	6	10	6	6	8
ENSG00000235669	AC004593.3	0	0	0	1	0	1	0	0	0	1	0	0
ENSG00000267755	AC004623.2	78	70	64	84	67	70	76	69	89	41	29	47
ENSG00000267304	AC004637.1	0	0	0	0	0	1	0	0	0	0	0	2
ENSG00000256806	AC004706.1	0	0	6	2	1	1	0	1	4	0	0	0
ENSG00000203562	AC004771.1	7	3	9	9	1	10	6	2	6	10	6	7
ENSG00000267453	AC004791.2	0	0	0	0	0	0	0	1	0	0	0	0
ENSG00000229944	AC004797.1	18	4	36	36	26	28	1	12	30	5	4	13
ENSG00000106540	AC004837.3	0	0	0	0	0	0	1	0	0	0	0	0
ENSG00000231951	AC004837.4	4	2	0	0	0	0	2	3	3	1	0	0
ENSG00000228554	AC004837.5	2	1	0	1	6	1	4	1	3	2	3	3
ENSG00000175873	AC004840.9	2	0	1	0	0	0	0	0	0	0	1	0
ENSG00000224804	AC004878.2	0	0	0	0	0	1	1	1	0	1	1	3
ENSG00000198632	AC004878.3	1	0	0	0	2	0	2	2	0	1	0	0
ENSG00000205508	AC004878.5	10	9	3	0	0	3	5	0	14	0	4	1
ENSG00000254977	AC004878.8	0	0	0	1	0	0	0	0	0	0	1	0
ENSG00000256178	AC004889.1	64	55	48	66	64	0	0	0	0	0	0	0
ENSG00000238109	AC004893.10	2	2	1	1	2	1	1	3	1	0	2	2
ENSG00000242687	AC004893.11	70	53	59	78	73	69	63	60	72	72	59	75
ENSG00000231704	AC004895.4	0	0	0	0	0	1	0	0	0	2	1	0
ENSG00000237286	AC004906.3	0	0	0	44	43	38	0	0	0	0	0	0
ENSG00000177820	AC004917.1	0	1	0	2	0	0	34	16	38	10	5	5
ENSG00000221553	AC004924.1	0	1	0	0	0	0	0	0	0	0	0	0
ENSG00000228151	AC004941.3	0	1	0	0	0	0	1	1	0	0	1	0
ENSG00000222024	AC004945.1	0	0	0	0	2	0	0	0	0	0	0	0
ENSG00000239556	AC004951.5	0	0	1	0	0	0	0	0	0	0	0	0
ENSG00000228434	AC004951.6	0	0	0	0	0	0	1	0	0	0	0	0
ENSG00000243554	AC004967.7	0	0	0	0	0	0	0	0	2	1	0	0
ENSG00000214243	AC004980.10	1	1	1	0	0	1	11	1	5	1	1	0
ENSG00000185040	AC004980.11	0	1	0	0	0	0	1	0	0	0	1	0
ENSG00000205485	AC004980.7	178	161	195	115	91	89	126	102	143	114	102	103
ENSG00000241057	AC004985.12	0	0	0	0	0	1	0	0	0	0	0	0
ENSG00000203446	AC004988.1	1	0	0	1	0	1	0	0	0	0	0	0
ENSG00000213888	AC005003.1	5	2	9	9	4	7	16	8	16	11	10	5
ENSG00000230370	AC005007.3	0	0	1	0	0	0	0	0	1	0	1	0
ENSG00000224280	AC005014.5	0	0	0	0	0	0	1	0	0	0	0	0
ENSG00000232458	AC005029.1	1	0	0	0	0	0	0	0	0	1	0	0
ENSG00000226247	AC005034.3	1	0	1	2	0	1	1	1	3	0	0	1
ENSG00000224346	AC005037.1	0	0	0	0	0	0	3	1	0	0	1	0
ENSG00000183308	AC005037.3	37	34	35	58	88	56	52	49	80	52	54	43
ENSG00000226658	AC005037.4	0	1	0	1	1	1	3	2	0	3	3	4
ENSG00000235318	AC005037.6	0	0	1	0	0	0	0	0	0	0	0	0
ENSG00000258821	AC005041.17	20	18	14	11	9	21	0	1	0	1	0	0
ENSG00000204380	AC005042.4	23	27	14	15	27	23	29	21	18	10	14	16
ENSG00000243004	AC005062.2	5271	4354	4562	3169	2752	2872	2914	2971	3762	5043	4420	5037
ENSG00000224046	AC005076.5	0	0	0	0	0	1	2	0	3	0	1	0
ENSG00000227038	AC005077.12	0	0	0	1	0	1	0	0	0	1	0	0
ENSG00000230882	AC005077.14	0	2	0	0	1	0	3	0	2	3	2	1
ENSG00000224273	AC005077.7	0	0	1	2	0	0	0	0	0	0	0	0
ENSG00000226816	AC005082.12	0	0	0	0	0	0	0	0	1	0	0	0
ENSG00000258093	AC005086.4	0	0	1	0	0	0	0	0	0	0	0	0
ENSG00000223374	AC005104.3	4	5	3	9	4	9	13	11	11	9	10	8
ENSG00000225286	AC005105.2	0	2	0	0	0	0	7	0	2	0	0	1
ENSG00000234899	AC005152.2	0	0	1	1	1	1	0	0	1	0	0	0
ENSG00000196295	AC005154.6	13	9	19	34	17	21	12	4	6	6	3	1
ENSG00000244480	AC005154.7	0	0	0	1	0	1	0	0	0	0	0	0
ENSG00000226874	AC005154.8	0	0	1	0	0	1	0	0	0	0	0	1
ENSG00000268153	AC005176.2	0	0	0	1	0	0	0	0	0	0	0	0
ENSG00000269694	AC005197.2	0	0	0	0	0	0	5	0	5	2	2	1
ENSG00000236352	AC005220.3	0	0	0	0	0	0	3	1	3	1	1	2
ENSG00000231595	AC005224.2	0	0	0	0	0	0	0	1	0	0	0	1
ENSG00000264918	AC005229.1	0	0	0	0	0	0	0	0	0	0	0	2
ENSG00000225521	AC005237.4	0	0	0	0	0	1	0	0	0	0	0	0
ENSG00000268030	AC005253.2	108	127	111	163	123	126	108	81	85	146	176	211
ENSG00000268983	AC005253.4	422	383	346	479	394	368	342	309	359	383	325	392
ENSG00000256210	AC005255.3	0	0	0	0	0	0	2	0	0	0	0	0
ENSG00000267073	AC005256.1	0	0	1	0	0	0	0	0	0	0	0	0
ENSG00000267688	AC005262.2	140	140	106	253	202	227	200	176	240	150	180	185
ENSG00000267139	AC005262.3	12	7	10	15	16	15	12	18	23	17	13	18
ENSG00000267551	AC005264.2	0	0	0	0	0	0	0	0	0	0	0	1
ENSG00000170468	AC005280.1	0	0	18	0	0	0	10	23	0	0	17	0
ENSG00000235343	AC005301.8	0	0	0	1	1	0	0	0	0	0	0	0
ENSG00000267283	AC005306.3	88	74	77	107	64	57	121	111	174	104	97	117
ENSG00000233002	AC005324.6	0	0	1	0	0	0	1	1	1	0	0	1
ENSG00000248015	AC005329.7	324	248	236	365	308	351	268	296	382	345	339	385
ENSG00000267372	AC005330.2	4	2	1	0	0	1	0	0	0	0	0	0
ENSG00000267218	AC005336.5	0	0	0	0	0	0	0	0	0	1	0	0
ENSG00000268565	AC005339.2	105	122	101	148	134	124	73	104	149	98	118	117
ENSG00000248493	AC005351.1	0	0	0	0	0	0	1	0	0	0	0	0
ENSG00000250994	AC005355.1	0	0	0	0	0	2	0	0	0	1	0	0
ENSG00000251169	AC005355.2	0	0	1	0	0	1	0	0	0	1	0	1
ENSG00000255513	AC005363.9	2	0	0	1	0	0	1	0	0	0	1	0
ENSG00000269191	AC005387.2	3	1	4	0	6	0	2	1	0	1	3	3
ENSG00000268938	AC005387.3	1	1	2	0	0	1	1	0	0	4	3	3
ENSG00000267159	AC005391.2	1	0	0	0	0	0	1	2	0	2	1	1
ENSG00000257040	AC005477.1	0	0	0	0	0	1	0	0	0	0	0	0
ENSG00000222012	AC005481.5	14	14	15	12	9	6	46	28	30	72	79	77
ENSG00000267421	AC005498.3	0	0	0	0	0	0	0	0	0	0	0	1
ENSG00000223878	AC005517.3	3	3	3	2	2	1	6	3	2	1	3	3
ENSG00000258559	AC005519.4	0	0	0	0	0	0	1	0	0	0	0	0
ENSG00000225703	AC005522.7	0	1	0	0	0	1	0	0	0	0	3	0
ENSG00000269604	AC005523.2	4002	4096	3838	5151	5298	5263	4460	4502	5249	5259	5332	5642
ENSG00000230825	AC005532.5	0	0	0	0	0	0	1	1	0	0	0	0
ENSG00000234450	AC005534.6	1	1	4	1	1	0	4	1	1	1	1	1
ENSG00000224903	AC005534.8	0	0	0	0	0	0	0	1	0	0	0	1
ENSG00000235852	AC005540.3	252	257	237	609	449	475	646	586	707	660	539	681
ENSG00000266939	AC005559.2	38	38	41	53	50	53	69	72	122	66	82	78
ENSG00000267036	AC005559.3	8	10	12	21	19	12	28	33	34	35	22	39
ENSG00000214719	AC005562.1	10	6	11	18	14	16	13	8	5	2	8	2
ENSG00000236714	AC005592.1	0	0	0	0	0	0	4	4	2	0	0	1
ENSG00000231185	AC005592.2	0	2	1	1	0	0	2	4	2	0	0	1
ENSG00000205790	AC005594.3	95	95	81	139	114	99	104	113	127	61	62	82
ENSG00000267223	AC005597.1	0	0	0	0	0	0	1	0	0	0	1	0
ENSG00000261790	AC005606.14	166	173	197	155	120	157	128	152	146	153	155	159
ENSG00000260107	AC005606.15	436	447	426	596	458	451	173	180	225	236	244	247
ENSG00000249034	AC005609.1	0	1	0	0	0	0	1	2	2	1	3	4
ENSG00000269296	AC005614.3	3	2	3	2	0	2	6	2	1	1	1	5
ENSG00000269749	AC005614.5	0	0	0	0	0	0	2	0	0	0	0	0
ENSG00000255729	AC005618.1	0	0	0	0	0	0	0	0	0	0	0	1
ENSG00000272070	AC005618.6	1	1	0	0	0	0	0	1	0	0	0	0
ENSG00000267201	AC005624.2	0	1	0	0	1	0	1	0	0	0	0	1
ENSG00000266963	AC005625.1	1	0	0	0	1	0	0	0	1	1	1	0
ENSG00000228649	AC005682.5	0	1	1	1	3	1	3	1	3	1	1	4
ENSG00000226329	AC005682.6	10	8	11	0	1	0	19	23	10	10	5	3
ENSG00000235664	AC005682.8	0	0	0	0	0	0	3	0	0	0	0	0
ENSG00000263820	AC005702.2	0	0	0	0	0	0	0	0	0	0	0	1
ENSG00000230971	AC005703.3	0	1	0	0	0	0	0	0	0	0	0	0
ENSG00000230607	AC005722.4	0	0	0	0	0	0	0	0	0	0	0	1
ENSG00000254099	AC005740.5	8	10	9	15	6	14	15	12	4	13	9	15
ENSG00000271871	AC005740.6	0	0	0	0	0	0	1	0	0	0	0	0
ENSG00000267044	AC005757.6	0	1	0	0	0	0	0	0	0	0	0	0
ENSG00000267037	AC005757.7	1	3	0	2	2	0	0	1	0	1	0	0
ENSG00000266933	AC005775.2	148	93	103	159	141	141	235	249	343	266	201	240
ENSG00000268189	AC005785.2	223	248	208	373	255	281	379	383	409	475	377	438
ENSG00000267231	AC005786.5	0	0	0	0	0	0	0	0	0	0	0	1
ENSG00000267436	AC005786.7	417	382	366	816	791	701	322	309	373	401	377	419
ENSG00000267473	AC005789.11	0	1	0	1	0	1	0	1	0	0	1	1
ENSG00000267090	AC005789.9	0	0	1	0	0	0	0	1	0	0	0	1
ENSG00000268034	AC005795.1	0	0	1	1	0	0	0	1	1	0	0	0
ENSG00000235554	AC005822.1	0	0	0	0	0	0	0	0	0	0	1	0
ENSG00000223544	AC005838.2	1	0	1	0	0	0	0	0	0	0	0	0
ENSG00000206044	AC005841.1	0	0	0	0	0	0	1	2	0	1	1	0
ENSG00000227694	AC005884.1	0	0	0	0	0	0	0	0	1	0	1	0
ENSG00000269019	AC005932.1	5	1	1	3	4	5	3	4	2	5	4	3
ENSG00000266926	AC005943.4	0	0	0	0	0	0	0	0	0	1	0	0
ENSG00000267161	AC005943.5	0	0	0	0	0	0	2	1	3	1	0	2
ENSG00000267469	AC005944.2	491	410	473	550	482	512	844	1003	1256	667	611	744
ENSG00000267205	AC005954.4	1	4	2	1	1	1	5	4	1	5	5	4
ENSG00000177418	AC006001.1	0	0	0	0	0	0	0	0	0	1	0	0
ENSG00000244563	AC006011.4	3	0	3	1	3	2	0	4	0	0	3	2
ENSG00000205505	AC006014.10	5	3	9	1	4	4	2	5	5	3	0	4
ENSG00000242073	AC006014.7	1	0	0	0	0	0	1	0	0	1	0	0
ENSG00000146722	AC006014.8	14	8	13	13	11	12	10	7	10	7	9	8
ENSG00000218305	AC006024.4	0	0	0	0	0	0	1	0	0	0	0	0
ENSG00000231357	AC006028.11	0	0	0	0	0	1	3	1	0	0	0	0
ENSG00000227719	AC006042.6	6	1	3	0	2	0	0	0	1	0	0	0
ENSG00000233108	AC006042.7	0	0	0	0	0	0	0	0	1	0	0	0
ENSG00000233264	AC006042.8	0	0	0	0	0	0	0	0	1	0	0	0
ENSG00000225563	AC006076.1	0	0	0	0	0	0	0	1	0	0	1	0
ENSG00000178430	AC006111.1	47	47	54	53	40	43	41	34	31	44	37	36
ENSG00000267192	AC006116.12	0	0	0	0	0	0	0	0	1	0	0	0
ENSG00000266932	AC006116.13	1	0	0	0	0	0	0	1	0	1	0	1
ENSG00000267549	AC006116.17	3	2	1	1	1	0	2	5	3	2	1	2
ENSG00000267710	AC006116.20	2	1	0	0	1	2	0	4	2	3	1	0
ENSG00000266907	AC006116.22	0	0	0	0	0	0	2	1	0	0	0	2
ENSG00000267776	AC006116.24	0	0	0	0	0	0	1	0	0	0	0	0
ENSG00000268355	AC006129.1	0	0	0	0	0	0	1	0	0	0	0	0
ENSG00000267063	AC006130.3	10	4	6	12	2	3	9	12	3	3	7	7
ENSG00000267757	AC006132.1	147	144	140	109	49	53	13	16	13	14	9	8
ENSG00000235427	AC006159.5	0	0	0	0	0	0	0	0	0	0	0	1
ENSG00000249502	AC006160.5	0	0	0	0	4	2	3	0	1	3	0	1
ENSG00000230173	AC006196.1	0	0	0	0	1	0	10	0	1	1	5	1
ENSG00000268621	AC006262.5	0	0	0	2	0	1	0	0	0	0	0	0
ENSG00000268460	AC006262.6	0	0	0	0	0	0	0	0	0	1	0	0
ENSG00000269483	AC006272.1	0	0	0	0	0	0	0	0	0	0	0	1
ENSG00000272473	AC006273.4	0	0	0	0	0	0	1	0	1	1	0	2
ENSG00000267530	AC006273.5	1	0	0	0	0	0	0	0	0	0	0	0
ENSG00000266927	AC006273.7	0	0	1	0	0	0	0	0	0	0	0	0
ENSG00000253392	AC006277.2	0	2	0	0	1	3	6	3	3	3	5	4
ENSG00000236213	AC006369.2	12	11	8	40	21	13	76	73	95	42	35	48
ENSG00000236861	AC006378.2	1	0	0	0	0	0	0	0	0	0	0	1
ENSG00000249148	AC006445.7	1	2	1	0	0	2	0	0	0	0	0	0
ENSG00000269094	AC006449.1	58	78	68	42	43	45	76	103	113	68	60	83
ENSG00000228509	AC006460.2	13	21	18	22	16	27	26	25	34	6	8	6
ENSG00000214998	AC006465.4	0	0	1	0	0	0	0	1	0	0	0	0
ENSG00000263900	AC006483.1	0	0	0	1	0	2	0	1	0	3	0	3
ENSG00000228974	AC006483.5	2	0	0	2	0	3	0	0	0	0	0	0
ENSG00000204957	AC006486.1	6	4	3	5	4	7	25	19	19	20	30	23
ENSG00000268643	AC006486.9	0	1	0	0	0	3	8	0	8	4	6	0
ENSG00000251338	AC006499.1	1	0	0	0	0	0	0	0	0	0	0	0
ENSG00000250505	AC006499.3	0	0	0	0	0	1	0	0	0	0	0	0
ENSG00000250573	AC006499.5	1	0	0	0	0	0	0	0	0	0	0	0
ENSG00000248777	AC006499.6	0	0	0	0	0	0	1	0	0	0	0	0
ENSG00000251296	AC006499.7	0	0	0	0	0	0	1	1	0	0	0	0
ENSG00000250040	AC006499.8	0	0	2	1	0	0	0	0	0	0	0	0
ENSG00000261342	AC006538.1	0	1	0	0	0	0	3	1	2	3	2	1
ENSG00000268070	AC006539.3	0	0	0	0	0	0	1	0	0	0	1	1
ENSG00000236540	AC006547.13	30	25	33	77	80	72	34	37	47	26	24	23
ENSG00000234409	AC006547.14	4	2	2	0	2	1	2	2	2	1	0	0
ENSG00000268292	AC006547.15	148	141	147	338	261	323	142	176	189	137	145	163
ENSG00000243762	AC006547.8	115	113	96	131	121	109	95	75	73	15	28	28
ENSG00000269194	AC006942.4	15	18	22	20	17	26	18	30	32	14	14	21
ENSG00000235328	AC006946.12	0	0	2	1	1	0	1	2	0	0	2	0
ENSG00000235478	AC006946.15	0	0	0	0	1	1	1	1	1	0	1	0
ENSG00000273203	AC006946.16	0	0	0	0	0	0	0	1	0	0	0	0
ENSG00000269446	AC006967.1	0	0	0	0	0	0	1	0	0	0	0	0
ENSG00000235859	AC006978.6	1	1	2	0	0	0	1	1	0	0	0	0
ENSG00000231063	AC006994.1	1	0	0	0	0	1	1	1	2	1	1	0
ENSG00000205580	AC006995.8	13	14	9	13	6	8	8	16	8	8	5	8
ENSG00000225726	AC007000.10	0	0	2	1	0	0	1	0	0	0	0	0
ENSG00000205482	AC007000.12	0	0	0	0	0	0	1	0	2	0	0	1
ENSG00000244239	AC007009.1	1	0	0	0	0	0	0	0	0	0	0	0
ENSG00000230751	AC007036.4	0	0	0	0	0	0	0	0	1	0	0	0
ENSG00000227017	AC007036.6	2	0	0	0	0	1	1	0	0	1	0	2
ENSG00000229127	AC007038.7	0	0	1	0	0	0	1	1	1	1	0	1
ENSG00000258881	AC007040.11	1	1	0	2	1	3	4	6	3	1	2	0
ENSG00000228384	AC007040.6	8	4	3	5	3	3	5	6	7	5	7	7
ENSG00000239322	AC007040.7	0	1	0	2	1	2	0	0	1	0	0	1
ENSG00000235411	AC007041.2	0	0	0	0	1	1	0	0	0	1	0	1
ENSG00000236003	AC007050.17	1	0	0	0	1	0	0	0	0	0	1	0
ENSG00000250261	AC007050.18	5	3	2	3	10	6	5	5	3	5	4	8
ENSG00000250614	AC007078.4	0	0	0	0	0	1	0	0	0	0	1	0
ENSG00000226605	AC007098.1	2	2	1	2	0	1	8	8	6	3	5	8
ENSG00000231172	AC007099.1	0	0	1	0	2	1	0	0	0	0	0	0
ENSG00000229970	AC007128.1	1	0	0	0	0	0	1	0	0	0	0	0
ENSG00000234718	AC007161.5	0	0	0	0	0	0	0	0	0	0	0	1
ENSG00000237166	AC007163.3	2	0	2	1	5	2	2	2	2	3	6	4
ENSG00000230408	AC007163.6	19	18	14	15	14	21	7	8	5	7	6	6
ENSG00000227736	AC007163.9	0	0	0	0	0	0	1	0	0	0	0	0
ENSG00000224721	AC007182.6	14	13	21	33	31	33	57	58	86	87	94	81
ENSG00000269145	AC007192.6	21	11	28	31	23	28	14	22	38	40	35	43
ENSG00000269151	AC007193.8	5	5	6	4	7	6	4	4	7	7	2	3
ENSG00000268810	AC007193.9	1	2	1	5	3	1	0	5	0	2	7	2
ENSG00000266163	AC007216.1	0	0	0	0	0	1	0	0	0	0	0	0
ENSG00000269696	AC007228.11	0	0	0	0	0	0	7	6	3	13	7	13
ENSG00000268568	AC007228.9	0	0	1	1	0	0	0	0	2	0	0	2
ENSG00000267544	AC007229.3	0	0	0	0	0	0	1	0	1	0	0	0
ENSG00000231043	AC007238.1	0	1	0	0	0	0	2	0	1	0	2	0
ENSG00000231312	AC007246.3	0	0	4	4	5	1	1	3	0	2	0	1
ENSG00000223813	AC007255.8	0	0	1	1	1	1	0	0	0	0	0	0
ENSG00000213090	AC007256.5	0	0	1	0	0	0	0	0	0	0	0	0
ENSG00000227855	AC007276.5	82	70	70	29	26	28	83	71	88	63	57	66
ENSG00000234389	AC007278.3	0	0	0	0	0	0	1	0	0	0	0	0
ENSG00000230799	AC007279.2	7	5	2	2	5	6	7	3	6	9	9	6
ENSG00000235579	AC007283.4	0	0	1	0	1	0	0	0	0	0	0	0
ENSG00000234431	AC007283.5	0	0	0	0	0	0	0	0	0	0	1	0
ENSG00000227014	AC007285.6	1	3	5	4	0	0	9	1	0	1	0	1
ENSG00000231519	AC007285.7	1	6	2	3	0	2	1	1	1	1	3	5
ENSG00000267938	AC007292.1	0	1	0	0	0	0	0	0	0	0	0	0
ENSG00000269318	AC007292.3	11	13	16	7	16	17	2	7	7	13	19	21
ENSG00000269807	AC007292.4	0	0	1	0	0	1	0	0	1	0	0	0
ENSG00000267980	AC007292.6	10	4	13	14	13	9	12	13	12	16	17	18
ENSG00000269425	AC007292.7	0	1	0	1	0	0	0	1	0	0	0	0
ENSG00000234252	AC007308.6	4	5	4	8	10	8	12	7	9	9	15	13
ENSG00000272600	AC007308.7	29	24	29	32	40	28	39	40	44	11	18	15
ENSG00000224946	AC007312.3	0	1	0	0	0	0	0	0	0	1	0	0
ENSG00000172974	AC007318.5	3	3	9	9	10	6	5	1	1	0	4	0
ENSG00000224063	AC007319.1	0	1	1	0	1	2	28	22	35	18	21	30
ENSG00000271275	AC007326.9	0	0	0	0	0	0	1	1	4	0	0	0
ENSG00000214696	AC007347.1	0	0	0	2	0	0	0	5	0	1	0	0
ENSG00000180672	AC007362.1	0	0	1	1	3	2	1	2	7	0	0	0
ENSG00000225216	AC007362.3	1	0	1	7	4	2	2	3	9	0	0	0
ENSG00000162947	AC007364.1	0	1	0	0	0	0	0	0	0	0	0	0
ENSG00000226756	AC007365.3	3	2	0	3	4	0	0	0	0	3	4	3
ENSG00000227791	AC007365.4	1	1	0	0	0	0	0	0	0	0	0	0
ENSG00000269883	AC007375.1	0	0	0	0	0	0	0	0	0	1	0	0
ENSG00000268688	AC007382.1	0	0	0	0	0	0	0	0	1	0	0	0
ENSG00000227946	AC007383.3	2	3	3	3	1	0	6	5	6	4	5	4
ENSG00000231955	AC007383.4	122	121	118	182	121	129	67	84	106	66	82	83
ENSG00000232613	AC007386.4	0	0	0	0	0	0	2	0	0	0	0	0
ENSG00000224646	AC007387.2	0	0	0	0	1	0	0	0	0	0	0	0
ENSG00000237979	AC007389.1	9	9	15	4	8	3	16	11	5	4	4	6
ENSG00000223739	AC007389.2	0	0	0	0	1	1	0	1	0	1	0	0
ENSG00000235725	AC007389.3	1	1	0	0	0	0	0	0	0	0	1	0
ENSG00000218739	AC007390.5	20	25	26	23	22	19	28	21	20	19	29	26
ENSG00000256845	AC007401.1	0	0	0	0	0	1	2	0	0	0	0	0
ENSG00000217075	AC007401.2	0	0	3	0	0	0	1	0	0	1	1	1
ENSG00000222033	AC007405.2	0	0	2	1	0	1	0	0	0	0	0	0
ENSG00000234350	AC007405.4	0	0	0	0	1	0	0	1	2	0	0	0
ENSG00000239467	AC007405.6	4	2	1	1	0	1	0	1	0	0	0	0
ENSG00000235934	AC007405.8	11	18	21	12	16	21	6	1	1	5	3	1
ENSG00000268503	AC007421.1	0	0	0	0	0	0	0	0	0	1	0	1
ENSG00000267893	AC007461.1	0	0	0	0	1	0	0	0	0	0	0	0
ENSG00000226101	AC007461.2	0	1	1	2	2	3	0	0	0	0	0	0
ENSG00000235993	AC007559.1	0	0	0	0	0	0	1	0	0	0	0	0
ENSG00000244055	AC007566.10	35	26	23	47	37	29	40	37	49	50	46	43
ENSG00000242539	AC007620.3	134	108	117	268	322	309	0	0	0	0	0	0
ENSG00000226297	AC007677.2	0	0	0	0	0	0	1	0	0	0	0	0
ENSG00000225610	AC007679.3	15	16	21	22	16	16	13	13	16	8	15	11
ENSG00000237041	AC007679.4	0	0	0	1	2	0	0	0	0	0	0	0
ENSG00000233251	AC007743.1	6	2	13	10	11	11	0	1	0	2	1	0
ENSG00000267213	AC007773.2	1	0	0	0	0	2	1	2	0	0	1	3
ENSG00000269093	AC007773.3	27	39	37	10	15	17	35	32	23	38	44	24
ENSG00000267610	AC007787.2	0	1	0	4	0	0	2	0	0	1	0	1
ENSG00000226205	AC007790.4	0	2	2	1	0	1	0	1	0	0	0	1
ENSG00000235982	AC007875.3	0	0	0	0	0	0	0	0	0	0	1	0
ENSG00000234902	AC007879.2	1	0	0	0	0	0	0	0	0	0	0	0
ENSG00000229647	AC007879.7	3	5	2	0	0	0	0	0	0	0	0	0
ENSG00000234572	AC007880.1	1	0	0	0	1	1	0	0	0	0	0	0
ENSG00000233870	AC007881.4	1	0	0	0	0	0	0	0	0	0	0	0
ENSG00000224891	AC007899.3	17	11	16	20	16	13	40	33	40	32	25	28
ENSG00000231384	AC007919.19	0	0	1	0	1	0	0	1	0	0	1	0
ENSG00000269496	AC007919.2	1	0	0	0	0	0	1	0	1	0	0	0
ENSG00000228157	AC007952.5	2	1	0	0	0	2	0	1	1	0	0	0
ENSG00000197665	AC007952.6	2	1	1	0	0	0	0	0	0	0	0	0
ENSG00000233762	AC007969.5	2	0	1	0	2	1	0	1	3	1	0	1
ENSG00000234281	AC007970.1	1	1	2	0	1	1	0	0	1	1	1	0
ENSG00000218672	AC008060.7	0	0	0	0	0	0	1	0	0	0	0	0
ENSG00000236544	AC008060.8	0	0	0	1	0	0	0	0	0	0	0	0
ENSG00000232642	AC008073.7	0	0	0	0	0	1	0	0	0	0	0	0
ENSG00000237217	AC008074.5	0	1	0	3	1	1	0	0	0	0	0	1
ENSG00000187979	AC008079.9	0	0	0	0	0	0	0	0	0	0	0	1
ENSG00000234764	AC008132.12	0	0	0	0	0	0	0	0	0	0	0	2
ENSG00000161103	AC008132.13	0	3	3	0	5	4	0	0	0	0	5	3
ENSG00000234113	AC008163.4	0	0	0	0	0	0	1	0	0	0	0	0
ENSG00000232968	AC008163.6	0	0	0	0	0	0	2	0	0	0	0	0
ENSG00000231570	AC008173.1	1	0	0	0	0	0	0	0	0	0	0	0
ENSG00000231646	AC008174.3	0	0	0	0	0	0	1	0	0	0	0	2
ENSG00000224545	AC008264.4	0	0	0	2	0	0	0	0	0	0	0	2
ENSG00000267941	AC008267.1	1	0	1	0	1	4	2	1	2	1	2	1
ENSG00000237510	AC008268.2	2	0	0	0	0	0	0	0	0	0	0	0
ENSG00000229321	AC008269.2	0	1	0	1	0	0	0	0	0	0	0	0
ENSG00000223642	AC008277.1	1	1	7	1	0	2	1	0	1	0	0	2
ENSG00000241114	AC008280.3	2	3	3	4	8	10	7	4	9	2	3	10
ENSG00000228909	AC008281.1	0	0	0	0	0	0	0	0	0	0	1	0
ENSG00000232324	AC008440.10	0	0	0	0	0	0	1	0	0	0	1	2
ENSG00000232220	AC008440.5	0	0	0	0	0	0	50	73	61	34	32	38
ENSG00000268397	AC008443.1	65	71	95	201	190	198	179	179	207	116	139	128
ENSG00000213084	AC008555.2	0	0	0	0	0	0	0	0	0	0	0	1
ENSG00000250955	AC008592.7	0	0	0	0	0	0	1	0	0	0	0	0
ENSG00000272021	AC008592.8	0	0	0	0	0	0	0	0	0	1	0	0
ENSG00000214109	AC008686.1	0	0	0	0	0	0	0	1	0	0	0	0
ENSG00000249738	AC008697.1	0	0	0	0	0	1	0	0	0	0	0	0
ENSG00000253298	AC008703.1	0	0	1	0	0	0	0	0	0	0	0	0
ENSG00000230259	AC008738.1	1	18	7	1	4	2	0	8	12	3	1	2
ENSG00000235681	AC008746.5	1	2	4	1	1	1	2	3	0	4	2	1
ENSG00000228323	AC008753.6	0	0	0	0	0	0	0	0	1	1	0	1
ENSG00000228737	AC008781.7	2	1	1	5	9	3	1	2	0	1	4	5
ENSG00000237705	AC008937.2	20	10	21	17	11	10	7	5	18	12	14	9
ENSG00000225230	AC008937.3	12	6	10	8	12	8	20	17	15	28	17	22
ENSG00000269688	AC008982.2	0	0	0	0	0	0	0	0	0	0	0	1
ENSG00000248166	AC008984.2	0	0	0	0	0	0	0	0	0	0	0	1
ENSG00000267751	AC009005.2	3	6	6	6	3	0	3	0	3	5	0	3
ENSG00000271824	AC009014.3	0	0	2	0	0	1	2	5	6	2	0	1
ENSG00000269746	AC009060.1	0	0	0	0	0	0	0	2	0	0	0	1
ENSG00000203401	AC009061.1	1	2	1	3	0	1	3	4	3	1	2	2
ENSG00000167970	AC009065.1	1197	1092	1113	1144	958	843	910	969	1238	880	773	795
ENSG00000196927	AC009093.1	0	0	0	0	0	0	1	0	0	2	0	0
ENSG00000237718	AC009095.4	0	2	0	0	2	1	0	1	0	0	1	6
ENSG00000261248	AC009120.10	0	0	0	1	0	0	1	0	0	0	0	0
ENSG00000239763	AC009120.3	0	0	0	0	0	1	0	0	0	0	0	0
ENSG00000260884	AC009120.5	2	3	2	2	5	2	4	3	8	2	4	3
ENSG00000259972	AC009120.6	514	409	444	613	574	535	1402	1290	1446	669	614	633
ENSG00000261690	AC009133.12	42	32	29	52	40	57	53	54	78	35	41	39
ENSG00000238045	AC009133.14	2485	2583	2565	3974	4095	4105	5525	6017	7558	5899	6052	6522
ENSG00000259952	AC009133.15	690	645	629	946	912	915	1721	1752	2422	2019	1851	2048
ENSG00000260719	AC009133.17	0	0	0	0	3	1	3	0	0	0	0	0
ENSG00000261962	AC009133.20	7	3	9	9	2	8	7	15	17	6	2	5
ENSG00000242628	AC009228.1	0	1	1	1	1	0	0	0	3	1	0	2
ENSG00000205054	AC009236.1	1	1	0	0	0	0	0	0	0	0	0	0
ENSG00000231054	AC009236.2	0	0	0	0	1	0	0	0	0	0	0	0
ENSG00000233037	AC009237.10	0	1	0	0	0	0	0	0	0	0	0	0
ENSG00000236431	AC009237.11	16	32	25	29	28	36	0	1	1	0	0	0
ENSG00000236750	AC009237.16	0	0	0	1	0	0	0	0	0	0	0	0
ENSG00000235959	AC009237.17	0	0	0	1	1	3	0	0	0	0	0	0
ENSG00000229689	AC009237.8	292	286	286	268	215	243	41	51	66	15	15	16
ENSG00000227120	AC009238.7	0	0	0	1	1	3	0	0	0	0	0	0
ENSG00000233275	AC009238.8	0	0	0	0	0	1	0	0	0	0	0	0
ENSG00000230383	AC009245.3	3	0	5	0	0	1	1	0	2	0	1	1
ENSG00000235724	AC009299.2	3	3	6	3	5	2	1	1	1	0	2	0
ENSG00000227403	AC009299.3	4	2	8	3	2	3	0	0	0	0	0	0
ENSG00000232320	AC009299.5	0	2	0	11	10	10	1	2	10	19	3	8
ENSG00000233868	AC009302.2	0	0	0	0	0	0	1	0	0	0	0	0
ENSG00000235066	AC009303.1	7	3	4	5	4	4	9	3	4	8	4	6
ENSG00000225911	AC009310.1	0	0	0	0	2	0	0	0	0	0	0	0
ENSG00000216895	AC009403.2	8	2	10	7	4	2	9	5	5	1	3	4
ENSG00000236255	AC009404.2	1	0	1	0	0	0	2	0	0	0	0	0
ENSG00000223911	AC009480.3	1	3	1	0	1	1	1	0	0	0	1	0
ENSG00000224076	AC009487.4	0	0	0	0	0	0	1	0	0	0	0	0
ENSG00000235192	AC009495.2	1	2	0	0	0	0	0	0	0	0	0	0
ENSG00000229195	AC009495.4	1	1	1	0	0	1	0	0	0	0	0	0
ENSG00000231609	AC009501.4	7	9	6	6	9	3	11	14	8	5	3	5
ENSG00000231802	AC009502.1	1	1	2	0	0	0	0	1	0	0	0	0
ENSG00000227308	AC009502.4	0	1	0	0	0	1	0	0	0	0	0	0
ENSG00000235522	AC009505.2	58	63	65	81	73	77	89	90	85	56	50	82
ENSG00000224152	AC009506.1	18	22	28	6	7	7	15	13	15	16	16	11
ENSG00000227197	AC009518.8	2	0	0	0	0	1	1	0	0	1	1	0
ENSG00000231794	AC009542.2	2	0	0	0	0	1	0	0	0	0	3	0
ENSG00000223960	AC009948.5	11	8	22	4	10	12	9	13	7	9	8	10
ENSG00000238082	AC009948.7	0	0	0	1	0	0	0	0	0	0	0	0
ENSG00000225963	AC009950.2	1	1	1	1	2	3	7	1	0	2	2	0
ENSG00000226266	AC009961.3	0	0	1	0	0	0	1	1	0	0	0	2
ENSG00000235951	AC009965.1	0	0	1	0	0	0	0	0	0	0	0	0
ENSG00000214369	AC009967.3	1	0	0	0	0	0	0	1	0	0	0	0
ENSG00000233491	AC010091.1	0	0	0	0	0	0	3	1	2	2	1	1
ENSG00000230196	AC010091.4	0	0	0	0	0	0	1	1	1	0	0	0
ENSG00000228763	AC010095.5	0	0	0	0	0	0	0	0	1	0	0	0
ENSG00000236107	AC010127.3	2	2	2	1	0	0	0	0	0	0	0	0
ENSG00000224490	AC010127.5	13	14	15	13	7	12	21	18	18	12	14	12
ENSG00000234983	AC010132.11	7	12	9	10	11	6	9	6	6	8	11	8
ENSG00000235726	AC010148.1	0	0	0	0	0	0	0	1	0	1	0	0
ENSG00000178550	AC010170.1	0	2	0	0	0	0	0	0	0	0	1	0
ENSG00000249249	AC010226.4	1054	746	1039	332	273	261	647	470	441	211	229	232
ENSG00000235253	AC010240.2	3	4	7	3	8	5	18	9	6	6	12	11
ENSG00000197071	AC010243.1	0	1	1	0	0	1	0	0	0	1	0	0
ENSG00000269808	AC010327.2	444	430	433	536	458	427	842	802	853	560	498	577
ENSG00000256989	AC010335.1	0	0	0	0	1	0	0	0	4	0	0	1
ENSG00000214248	AC010336.1	425	435	399	1526	1444	1521	2017	1606	1592	1989	2066	2096
ENSG00000269636	AC010441.1	4	5	5	9	3	7	9	0	1	0	2	2
ENSG00000214784	AC010468.1	3	0	0	1	1	0	1	0	0	0	0	0
ENSG00000267219	AC010504.2	0	0	0	0	0	0	0	2	0	1	0	0
ENSG00000269304	AC010522.1	0	0	2	0	0	2	0	0	0	2	0	0
ENSG00000268686	AC010524.2	7	4	11	1	2	2	11	10	7	0	3	6
ENSG00000268157	AC010524.4	1	1	0	0	0	0	0	0	2	1	2	1
ENSG00000267117	AC010525.4	2	2	1	0	4	1	3	1	1	0	0	1
ENSG00000226180	AC010536.1	0	1	0	0	1	0	0	2	2	1	0	2
ENSG00000261611	AC010547.9	4	0	0	0	0	0	0	0	0	0	0	0
ENSG00000267443	AC010641.1	0	0	0	0	0	0	0	0	0	0	2	0
ENSG00000267216	AC010642.1	1	0	4	0	0	0	15	5	18	10	20	4
ENSG00000269794	AC010642.2	1	0	1	1	5	1	2	1	3	1	2	2
ENSG00000228577	AC010731.2	0	0	1	0	0	0	0	0	0	0	0	0
ENSG00000228414	AC010733.4	0	0	0	0	0	0	0	3	0	0	0	0
ENSG00000232713	AC010733.5	0	2	2	3	4	0	2	0	2	0	0	3
ENSG00000237824	AC010747.2	0	0	0	1	0	0	0	0	0	0	0	0
ENSG00000265840	AC010761.10	59	58	64	99	70	91	125	133	89	91	70	90
ENSG00000265205	AC010761.13	3	2	2	3	1	1	7	3	3	1	2	7
ENSG00000265073	AC010761.6	21	35	21	13	12	14	4	2	6	8	2	4
ENSG00000264577	AC010761.8	1821	1716	1787	1387	1373	1413	1537	1521	2040	1688	1406	1727
ENSG00000265474	AC010761.9	33	32	21	29	28	29	37	22	24	38	35	48
ENSG00000234936	AC010883.5	0	0	0	0	1	2	0	1	2	0	3	0
ENSG00000226853	AC010894.3	1	1	0	0	1	0	1	0	0	0	0	0
ENSG00000237370	AC010907.2	0	0	0	0	0	0	0	0	0	3	1	1
ENSG00000224661	AC010907.5	1	0	0	0	0	0	0	0	0	0	0	0
ENSG00000188525	AC010969.1	0	1	0	0	0	0	0	0	0	0	1	0
ENSG00000225840	AC010970.2	0	0	0	0	0	0	0	0	0	0	1	0
ENSG00000230065	AC010974.3	0	0	0	0	1	0	0	0	0	0	0	0
ENSG00000231731	AC010976.2	28	25	17	35	50	39	39	43	45	64	33	44
ENSG00000237732	AC010980.2	49	41	48	20	27	21	0	0	0	0	0	0
ENSG00000224361	AC011239.1	0	0	1	0	1	1	0	0	0	0	0	0
ENSG00000229695	AC011242.5	0	1	0	0	0	0	0	0	0	0	0	0
ENSG00000223658	AC011242.6	0	0	0	0	0	0	0	4	6	0	3	2
ENSG00000235586	AC011247.3	1	0	0	0	0	0	0	1	2	2	0	1
ENSG00000236510	AC011284.3	1	0	0	0	0	0	0	0	0	0	0	0
ENSG00000236015	AC011290.5	5	5	10	10	7	7	10	5	13	12	3	11
ENSG00000249839	AC011330.5	0	0	0	4	14	0	0	7	6	0	0	0
ENSG00000224677	AC011330.6	1	3	0	1	0	0	0	0	0	0	1	0
ENSG00000253311	AC011343.1	0	0	0	0	0	1	0	0	0	0	0	0
ENSG00000197830	AC011385.1	4	2	1	6	5	5	35	23	21	30	20	35
ENSG00000248696	AC011406.2	1	2	1	2	3	1	0	3	1	5	3	6
ENSG00000220693	AC011498.1	0	0	0	2	0	0	0	0	0	0	1	0
ENSG00000267107	AC011526.1	1	0	0	0	0	0	3	2	1	0	0	1
ENSG00000268434	AC011530.4	0	0	0	0	0	0	0	1	1	2	0	0
ENSG00000267020	AC011558.5	931	971	1015	1705	1428	1486	1020	932	1069	1281	1286	1451
ENSG00000216522	AC011718.1	0	0	0	0	0	0	0	0	0	1	0	2
ENSG00000223579	AC011718.2	0	0	0	0	1	1	0	0	0	0	0	0
ENSG00000204196	AC011737.2	10	0	7	3	11	0	3	14	9	9	3	9
ENSG00000231638	AC011738.4	0	0	0	0	0	0	24	16	20	5	5	13
ENSG00000231655	AC011742.3	0	0	0	1	0	0	3	0	1	0	2	0
ENSG00000231435	AC011747.3	0	0	0	0	0	0	0	0	2	0	1	0
ENSG00000236008	AC011747.4	0	0	0	0	0	0	1	0	1	0	0	1
ENSG00000235092	AC011747.7	0	0	0	0	0	0	2	0	1	1	7	4
ENSG00000269686	AC011755.1	0	0	1	0	0	0	0	0	0	0	0	0
ENSG00000226806	AC011893.3	0	0	0	0	0	0	0	0	0	0	1	0
ENSG00000231980	AC011899.10	0	0	0	0	0	0	0	1	0	0	0	0
ENSG00000233038	AC011899.9	0	0	0	0	0	0	1	0	0	1	0	0
ENSG00000228007	AC011933.2	0	0	0	1	0	0	0	0	0	0	0	0
ENSG00000222017	AC011997.1	0	0	0	0	0	0	0	2	0	0	0	0
ENSG00000172332	AC012005.2	0	0	0	0	0	0	2	0	0	0	0	0
ENSG00000260396	AC012065.7	3	4	6	1	0	0	1	2	3	2	2	2
ENSG00000213197	AC012066.1	0	0	0	0	0	1	0	0	0	0	0	0
ENSG00000179061	AC012074.1	0	0	0	0	0	0	1	0	0	0	0	0
ENSG00000228835	AC012123.1	0	0	0	1	0	0	0	0	0	0	0	0
ENSG00000234327	AC012146.7	0	0	2	0	0	3	5	2	1	2	0	0
ENSG00000204685	AC012307.3	500	435	449	568	515	532	728	718	1032	672	620	683
ENSG00000269855	AC012313.1	0	0	0	0	0	0	1	0	0	0	1	0
ENSG00000224579	AC012314.19	2	2	0	1	1	1	1	2	1	0	2	1
ENSG00000223660	AC012314.20	0	1	0	0	0	0	1	0	0	0	0	0
ENSG00000237017	AC012314.8	218	174	147	348	285	326	255	255	309	323	356	365
ENSG00000224543	AC012318.3	9	6	7	17	7	7	20	9	16	13	17	14
ENSG00000227799	AC012358.4	4	14	8	10	3	15	20	10	18	9	8	16
ENSG00000240401	AC012358.8	19	13	13	19	15	7	9	6	20	14	4	11
ENSG00000235319	AC012360.4	1	0	0	0	1	0	1	0	2	0	0	1
ENSG00000238273	AC012360.6	19	18	11	18	15	13	6	2	2	5	4	5
ENSG00000213081	AC012362.3	0	0	0	1	0	0	0	0	0	1	2	2
ENSG00000224789	AC012363.4	0	1	0	0	8	3	15	9	20	12	5	5
ENSG00000236878	AC012363.7	1	0	0	1	0	0	0	0	1	1	0	1
ENSG00000227788	AC012363.8	0	0	0	0	0	0	1	0	1	0	0	0
ENSG00000234255	AC012370.3	1	1	0	0	0	1	1	2	0	1	0	0
ENSG00000235883	AC012379.1	0	0	0	0	0	0	0	0	0	2	3	0
ENSG00000243389	AC012442.5	0	0	0	0	0	0	0	1	0	0	0	0
ENSG00000228251	AC012442.6	0	0	0	0	1	0	0	0	0	0	0	0
ENSG00000203363	AC012454.4	0	0	0	0	0	0	1	0	0	1	0	0
ENSG00000214184	AC012487.2	0	1	0	1	0	0	0	1	3	0	0	0
ENSG00000226539	AC012512.1	0	4	0	7	3	3	0	1	1	1	0	0
ENSG00000236478	AC012513.4	3	2	3	0	1	1	1	0	1	0	1	1
ENSG00000260597	AC012531.25	0	0	0	0	0	0	0	0	0	0	1	0
ENSG00000253406	AC012613.2	1	2	2	15	13	15	0	0	0	0	0	1
ENSG00000198683	AC012615.1	0	0	0	0	0	0	0	1	0	0	0	0
ENSG00000225108	AC013268.2	228	224	8	134	119	128	150	159	289	97	61	90
ENSG00000235721	AC013268.3	0	0	0	0	0	0	0	0	1	0	0	0
ENSG00000204588	AC013268.5	16	10	13	9	7	11	9	8	10	3	3	1
ENSG00000256066	AC013269.1	0	0	0	0	0	0	0	2	1	0	0	0
ENSG00000272888	AC013394.2	37	50	51	34	20	10	26	25	27	17	12	17
ENSG00000237016	AC013410.1	0	0	0	0	0	0	3	2	0	1	0	2
ENSG00000234995	AC013429.5	0	0	1	0	0	0	1	1	0	0	0	0
ENSG00000224288	AC013437.2	0	0	0	0	0	0	1	0	0	0	0	0
ENSG00000233996	AC013439.4	0	0	0	0	1	0	1	0	0	2	0	0
ENSG00000205500	AC013472.3	0	0	0	1	0	0	0	0	1	0	1	0
ENSG00000266728	AC015688.3	0	0	0	1	1	0	0	0	0	0	0	0
ENSG00000231096	AC015726.1	0	0	0	0	0	0	0	0	0	0	0	2
ENSG00000267578	AC015849.12	0	0	0	0	0	0	1	0	0	0	0	0
ENSG00000267347	AC015849.13	0	0	0	0	0	0	0	0	0	0	0	1
ENSG00000267326	AC015849.14	1	0	0	0	2	0	1	0	0	0	0	0
ENSG00000266999	AC015849.16	0	1	0	1	0	0	9	3	0	1	0	3
ENSG00000267025	AC015849.19	2	2	0	3	2	1	5	5	2	3	5	4
ENSG00000224911	AC015936.3	24	29	29	24	26	25	9	18	13	4	5	7
ENSG00000228363	AC015971.2	130	127	162	122	122	116	158	115	128	136	134	163
ENSG00000225378	AC015977.6	0	0	0	0	0	0	1	0	0	0	0	0
ENSG00000224746	AC015987.1	2	1	2	1	2	3	0	0	2	1	1	2
ENSG00000236338	AC015987.2	5430	4589	5454	4855	5857	4719	4685	4452	5846	3806	4491	4837
ENSG00000269630	AC015989.2	0	0	1	0	0	0	1	0	0	0	0	0
ENSG00000108958	AC016292.3	1	4	0	0	1	0	2	5	0	1	1	0
ENSG00000205147	AC016586.1	1	0	1	1	1	1	0	0	1	1	0	1
ENSG00000269600	AC016629.3	172	162	166	237	186	180	96	102	96	89	78	109
ENSG00000269032	AC016629.7	0	3	1	0	0	0	0	0	0	0	0	0
ENSG00000267858	AC016629.8	39	40	32	35	23	32	79	78	69	72	81	107
ENSG00000235635	AC016644.1	0	0	0	1	0	0	1	2	0	0	0	1
ENSG00000234174	AC016683.5	0	0	0	0	1	1	1	1	0	0	0	0
ENSG00000189223	AC016683.6	0	1	1	2	3	5	104	78	67	73	78	72
ENSG00000233741	AC016691.2	0	0	0	0	0	0	0	0	0	1	0	0
ENSG00000228380	AC016697.2	2	3	3	1	3	3	1	0	2	2	4	2
ENSG00000226505	AC016700.3	0	2	1	1	0	3	1	2	2	6	2	3
ENSG00000231327	AC016700.5	0	0	0	0	0	0	0	1	3	3	2	3
ENSG00000239332	AC016722.2	0	0	0	1	0	1	0	0	1	0	0	0
ENSG00000226548	AC016722.3	0	0	0	0	1	0	0	0	0	0	0	0
ENSG00000228925	AC016722.4	131	138	123	134	86	96	85	43	51	42	39	34
ENSG00000235335	AC016723.4	4	5	3	6	8	4	0	0	1	0	0	0
ENSG00000224043	AC016725.4	1	0	0	1	0	1	1	1	0	0	0	1
ENSG00000228305	AC016734.2	0	0	0	0	2	0	0	0	0	0	0	0
ENSG00000235414	AC016737.1	0	0	0	0	0	0	0	1	0	0	0	0
ENSG00000230140	AC016738.3	1	6	3	1	2	2	1	0	0	0	0	0
ENSG00000223947	AC016738.4	159	151	151	81	74	65	7	9	12	4	3	3
ENSG00000218175	AC016739.2	0	0	0	1	0	0	0	0	1	0	0	1
ENSG00000238091	AC016745.1	2	1	0	1	1	1	0	0	0	1	3	1
ENSG00000234997	AC016745.3	0	0	0	0	0	0	0	0	3	0	0	0
ENSG00000212978	AC016747.3	13	12	18	8	6	4	7	11	10	2	2	8
ENSG00000186235	AC016757.3	0	0	0	0	0	0	1	0	0	0	0	0
ENSG00000218422	AC016773.1	1	0	0	1	0	1	0	1	0	0	1	2
ENSG00000232716	AC016831.6	0	0	0	0	0	1	0	0	0	0	0	0
ENSG00000233559	AC016831.7	18	13	11	24	13	15	39	16	14	9	18	12
ENSG00000234060	AC016906.1	1	0	0	0	0	1	0	0	0	0	1	1
ENSG00000232377	AC016910.1	0	1	1	0	0	0	0	1	0	0	0	0
ENSG00000228100	AC016912.3	0	0	0	0	0	0	1	0	0	0	0	0
ENSG00000229915	AC016999.2	32	15	19	12	8	9	4	6	9	8	4	4
ENSG00000240350	AC017002.1	3	4	5	8	15	8	33	15	12	16	15	14
ENSG00000224959	AC017002.2	0	0	0	0	1	0	3	4	2	3	1	1
ENSG00000225744	AC017002.4	1	1	0	0	0	0	1	0	0	0	0	0
ENSG00000163364	AC017048.3	0	0	0	0	0	0	4	3	2	2	2	1
ENSG00000224577	AC017048.4	0	0	0	0	0	0	2	2	1	1	0	0
ENSG00000233479	AC017074.1	0	0	0	0	0	0	1	1	0	0	0	0
ENSG00000233829	AC017078.1	0	0	0	2	0	0	0	2	0	0	0	0
ENSG00000185631	AC017079.3	0	0	0	0	0	0	0	0	1	0	0	0
ENSG00000236259	AC017083.2	1	0	0	1	0	0	0	0	0	0	0	1
ENSG00000228486	AC017099.3	0	0	1	1	1	0	0	3	0	0	0	0
ENSG00000227227	AC017101.10	35	40	44	73	47	73	66	76	77	41	53	50
ENSG00000233538	AC017104.2	0	2	2	4	2	7	7	5	1	8	3	7
ENSG00000224376	AC017104.6	0	0	0	0	0	0	4	5	0	1	0	0
ENSG00000239775	AC017116.11	0	0	0	0	0	0	3	0	0	0	0	0
ENSG00000229839	AC018462.2	12	8	15	5	4	9	9	7	4	9	14	11
ENSG00000230154	AC018463.4	1	0	0	0	2	0	1	1	0	0	0	1
ENSG00000268301	AC018630.1	0	0	1	1	0	0	0	0	0	0	0	0
ENSG00000226468	AC018641.7	0	0	0	0	0	0	1	0	1	0	0	0
ENSG00000227544	AC018647.3	0	2	1	0	0	0	0	1	0	0	0	0
ENSG00000225284	AC018693.6	1	5	1	3	0	0	2	3	1	3	2	2
ENSG00000226615	AC018696.1	0	1	0	0	0	0	0	0	0	0	0	0
ENSG00000230104	AC018712.2	0	0	0	0	0	0	1	1	0	0	0	1
ENSG00000170092	AC018720.10	6	1	1	1	0	2	6	5	5	2	5	5
ENSG00000236859	AC018737.1	20	12	16	15	17	15	20	23	21	15	17	21
ENSG00000230993	AC018737.6	2	1	0	0	1	1	1	2	3	1	2	2
ENSG00000229621	AC018742.1	0	0	0	0	0	1	0	0	0	0	0	0
ENSG00000167765	AC018755.1	1	1	0	0	5	6	8	4	15	3	3	5
ENSG00000269388	AC018755.16	0	0	1	0	1	0	0	0	0	0	0	0
ENSG00000273318	AC018755.2	0	0	0	1	0	0	2	0	1	1	0	1
ENSG00000267896	AC018766.4	28	28	17	33	25	26	60	61	57	42	50	49
ENSG00000269352	AC018766.5	7	17	10	12	21	14	56	27	29	41	36	35
ENSG00000268047	AC018766.6	1	2	0	4	2	7	6	1	2	4	8	4
ENSG00000225539	AC018799.1	0	0	0	0	0	0	1	0	1	0	0	0
ENSG00000227632	AC018804.6	3	0	1	1	0	0	1	0	0	0	0	0
ENSG00000235978	AC018816.3	0	0	1	0	0	0	1	0	0	0	0	0
ENSG00000180178	AC018865.8	0	0	0	0	0	0	1	0	0	0	0	0
ENSG00000268846	AC018867.2	3	0	0	1	1	0	1	2	2	0	2	3
ENSG00000233339	AC018878.3	1	0	0	0	0	1	0	0	0	0	1	0
ENSG00000236449	AC018890.6	3	1	1	0	0	0	0	1	0	0	0	1
ENSG00000188383	AC018892.9	9	10	8	0	5	2	17	12	17	12	12	7
ENSG00000235911	AC019055.1	0	0	0	0	1	0	0	0	0	0	0	0
ENSG00000224007	AC019070.1	0	0	0	0	0	0	1	0	1	2	0	1
ENSG00000228030	AC019084.7	0	0	0	0	0	0	0	1	1	0	0	0
ENSG00000231822	AC019097.7	8	7	7	7	10	7	11	4	3	1	0	2
ENSG00000224637	AC019129.2	0	2	0	1	0	0	1	1	0	2	2	0
ENSG00000269210	AC019171.1	2	0	2	0	1	0	1	2	0	2	0	0
ENSG00000225900	AC019171.4	0	0	0	0	0	0	1	0	0	0	0	0
ENSG00000227363	AC019172.2	0	0	1	0	0	1	0	0	0	0	0	0
ENSG00000223824	AC019178.3	0	0	0	0	0	0	1	0	0	0	0	0
ENSG00000243637	AC019221.4	2	2	0	0	0	0	0	0	4	4	5	5
ENSG00000256530	AC019294.1	1	3	6	2	0	1	2	0	0	1	1	1
ENSG00000229732	AC019349.5	0	0	0	0	0	0	4	2	2	3	0	2
ENSG00000229056	AC020571.3	0	0	0	1	0	0	0	0	0	0	0	0
ENSG00000256599	AC020663.1	0	5	0	0	0	0	0	0	0	0	0	0
ENSG00000203403	AC020907.2	0	0	0	0	0	0	1	0	0	0	0	0
ENSG00000256383	AC020910.2	1	1	0	0	1	0	0	1	2	3	1	1
ENSG00000268866	AC020915.2	0	0	2	0	0	1	1	1	2	2	1	0
ENSG00000267839	AC020956.3	0	0	0	0	0	1	0	0	0	0	0	0
ENSG00000225062	AC021016.6	0	0	0	0	1	0	0	0	0	0	0	0
ENSG00000237281	AC021016.8	1	0	0	0	0	0	0	0	0	0	0	0
ENSG00000227325	AC021106.1	0	0	0	0	0	0	1	0	0	0	0	0
ENSG00000230747	AC021188.4	0	1	1	0	0	0	1	0	0	4	3	2
ENSG00000204876	AC021218.2	0	0	1	1	2	2	10	3	4	2	1	2
ENSG00000262477	AC021224.1	10347	9372	8385	4422	4215	3157	5496	6098	8680	6576	5532	7394
ENSG00000224512	AC021593.1	0	0	0	0	0	0	0	0	0	0	1	0
ENSG00000232627	AC021876.4	1	0	0	1	0	0	2	0	1	0	2	3
ENSG00000206567	AC022007.5	5	13	18	28	38	49	39	49	45	19	11	30
ENSG00000267623	AC022153.1	0	0	0	0	0	0	0	1	0	0	0	0
ENSG00000268093	AC022154.7	14	11	12	9	18	13	4	7	9	7	7	11
ENSG00000233849	AC022201.5	4	6	9	4	3	6	1	2	2	4	1	3
ENSG00000213399	AC022210.2	0	0	0	0	0	0	4	0	0	1	0	0
ENSG00000267964	AC022400.2	20	7	17	24	32	22	19	16	23	16	16	17
ENSG00000226221	AC022431.1	1	1	1	0	0	0	1	0	3	2	1	2
ENSG00000197604	AC022532.1	0	0	1	0	0	0	0	0	0	0	0	0
ENSG00000259921	AC022819.3	0	0	0	0	0	0	5	2	0	0	0	0
ENSG00000235661	AC023085.1	0	0	0	0	0	0	1	0	0	0	0	0
ENSG00000228513	AC023271.1	2	1	0	0	0	1	0	2	0	0	3	0
ENSG00000225124	AC023271.2	0	0	1	0	0	0	0	0	0	0	1	1
ENSG00000206176	AC023490.1	0	0	0	2	1	1	0	0	0	3	0	0
ENSG00000235704	AC023490.2	2	0	2	0	2	0	8	5	1	8	2	3
ENSG00000225885	AC023590.1	3	0	2	0	4	0	0	0	0	0	0	0
ENSG00000212997	AC023632.1	4	1	1	6	2	2	2	2	3	2	2	3
ENSG00000231923	AC024082.3	0	0	0	0	0	0	1	0	0	0	0	0
ENSG00000236833	AC024560.2	1	0	0	0	0	2	4	4	0	2	1	1
ENSG00000214135	AC024560.3	2	0	5	12	4	10	11	11	4	9	2	7
ENSG00000204533	AC024580.1	0	1	1	1	0	1	1	0	0	0	0	1
ENSG00000267740	AC024592.12	0	0	0	1	0	0	0	0	2	0	0	0
ENSG00000267709	AC024592.9	0	0	0	0	0	0	3	1	0	0	0	0
ENSG00000238007	AC024619.2	0	0	0	0	0	0	0	1	0	0	0	0
ENSG00000228413	AC024937.2	1	0	0	0	0	0	2	1	0	0	0	1
ENSG00000231464	AC024937.4	0	1	0	0	0	1	2	3	0	1	0	0
ENSG00000231443	AC024937.6	6	5	3	6	3	4	15	17	14	4	8	6
ENSG00000177340	AC024940.1	14	20	17	17	19	13	17	18	14	24	23	24
ENSG00000224713	AC025165.8	0	0	0	0	0	0	65	62	81	35	52	48
ENSG00000215068	AC025171.1	4	4	11	8	5	3	20	14	9	15	22	16
ENSG00000268028	AC025262.1	13	6	10	2	4	2	6	8	8	0	3	1
ENSG00000179859	AC025335.1	4	1	3	6	3	2	5	4	3	5	1	3
ENSG00000253744	AC025442.3	37	37	23	51	31	42	75	68	102	51	55	69
ENSG00000224254	AC025627.4	0	0	0	0	0	0	1	0	1	0	0	0
ENSG00000236913	AC025750.5	0	0	0	0	0	0	0	1	1	0	1	0
ENSG00000225798	AC025918.2	3	4	4	5	5	1	5	0	0	5	4	5
ENSG00000225930	AC026150.5	0	0	0	0	0	0	0	0	0	0	0	1
ENSG00000260693	AC026150.8	0	0	0	0	0	0	0	0	1	0	0	0
ENSG00000233026	AC026166.2	0	0	0	0	0	0	0	0	0	0	0	1
ENSG00000268509	AC026202.1	1014	949	913	583	231	271	297	221	162	187	142	175
ENSG00000233912	AC026202.3	3	1	2	0	3	0	1	1	0	1	0	3
ENSG00000174977	AC026271.5	0	1	2	2	0	0	5	3	8	0	0	1
ENSG00000268865	AC026310.1	2	2	1	3	3	1	0	0	0	0	0	0
ENSG00000268432	AC026407.1	0	2	1	2	0	0	1	2	0	1	0	1
ENSG00000268885	AC026740.1	2	3	1	5	1	2	5	2	3	2	3	3
ENSG00000268913	AC026806.2	1	0	2	5	3	1	2	0	0	0	0	0
ENSG00000224647	AC026954.6	0	0	0	0	0	0	1	0	0	0	0	0
ENSG00000223398	AC027124.2	0	0	0	0	0	0	1	1	0	0	0	0
ENSG00000268838	AC027228.1	1	1	2	0	1	0	2	1	3	1	0	1
ENSG00000222720	AC027307.1	0	1	0	0	0	0	0	0	0	0	0	0
ENSG00000268798	AC027307.3	0	0	0	0	0	0	1	0	0	0	2	0
ENSG00000260005	AC027601.1	166	213	173	230	204	184	155	152	149	220	232	244
ENSG00000232531	AC027612.1	0	1	0	0	0	0	0	0	0	0	0	0
ENSG00000223703	AC027612.4	0	0	0	0	0	1	0	0	0	0	0	0
ENSG00000143429	AC027612.6	1	0	0	1	1	0	5	2	3	3	1	3
ENSG00000215067	AC027763.2	0	0	2	2	0	0	1	1	0	1	0	0
ENSG00000180385	AC034193.5	3	2	6	12	11	11	13	11	12	8	6	3
ENSG00000229217	AC034193.7	0	0	0	0	0	0	0	0	0	1	0	0
ENSG00000233006	AC034220.3	1	0	0	1	2	3	3	1	5	2	1	0
ENSG00000196193	AC034229.1	0	0	0	0	0	0	1	0	0	0	0	1
ENSG00000253404	AC034243.1	0	2	2	0	0	0	1	1	0	1	1	1
ENSG00000233635	AC037445.1	0	1	0	0	0	0	0	0	0	0	0	0
ENSG00000248235	AC037459.4	2	0	0	0	0	0	0	3	0	1	2	1
ENSG00000257026	AC040173.1	1	0	0	0	0	0	0	0	0	0	0	0
ENSG00000269871	AC040977.1	1103	969	975	1898	1859	1683	777	871	1046	1054	955	1088
ENSG00000229334	AC046143.3	7	2	5	1	6	7	6	5	5	8	7	12
ENSG00000232873	AC046143.6	0	0	0	0	0	0	2	0	0	0	0	0
ENSG00000227432	AC053503.11	0	0	0	0	0	1	2	0	0	0	0	0
ENSG00000229525	AC053503.4	0	0	0	0	0	0	0	0	0	0	1	0
ENSG00000234136	AC055764.1	6	2	3	0	1	2	3	2	3	3	2	5
ENSG00000226359	AC055811.5	0	2	0	2	0	0	1	0	0	1	1	0
ENSG00000267737	AC061992.2	0	0	1	1	0	0	0	0	0	0	0	0
ENSG00000222020	AC062017.1	0	0	0	0	0	2	0	0	0	0	0	1
ENSG00000234028	AC062029.1	7	8	4	4	5	5	20	13	3	5	5	7
ENSG00000224431	AC063976.7	6	4	4	7	12	8	54	24	13	13	17	24
ENSG00000224099	AC064834.1	0	0	0	0	0	0	4	1	2	7	7	3
ENSG00000223466	AC064834.2	0	0	0	0	0	0	2	3	2	2	2	6
ENSG00000234919	AC064834.3	0	0	0	0	0	0	1	0	0	1	0	0
ENSG00000226261	AC064836.3	0	0	0	0	0	0	4	0	0	1	0	0
ENSG00000235651	AC064850.4	0	0	0	0	0	0	0	0	1	0	0	0
ENSG00000241409	AC064852.4	6	4	2	1	2	1	4	4	4	2	2	3
ENSG00000213055	AC064852.5	2	4	2	1	1	1	1	0	2	0	2	7
ENSG00000250599	AC064853.3	0	0	0	0	0	0	1	0	0	0	0	0
ENSG00000224643	AC064871.3	2	0	1	2	1	1	0	0	0	0	0	0
ENSG00000236451	AC067956.1	0	0	0	0	0	0	2	5	5	1	2	0
ENSG00000228389	AC068039.4	1	0	1	1	0	0	0	0	0	0	0	0
ENSG00000204121	AC068134.5	0	0	0	0	0	0	0	1	0	0	0	0
ENSG00000238171	AC068196.1	0	1	0	4	6	3	2	1	4	3	8	8
ENSG00000236682	AC068282.3	0	0	0	0	1	0	2	0	0	0	1	0
ENSG00000229118	AC068491.2	1	0	1	2	0	1	2	2	2	2	1	0
ENSG00000223973	AC068491.3	0	0	0	3	0	2	5	3	0	0	2	2
ENSG00000268650	AC068499.10	0	0	1	0	0	0	0	0	1	0	0	0
ENSG00000242970	AC068522.4	0	0	0	0	0	0	1	1	0	0	0	0
ENSG00000249319	AC068533.7	1	2	2	0	8	0	5	4	15	0	3	0
ENSG00000204637	AC068538.2	0	0	0	1	0	0	0	0	0	0	0	0
ENSG00000229512	AC068580.5	0	0	0	1	0	0	0	1	0	1	0	0
ENSG00000235027	AC068580.6	167	155	160	260	212	209	316	295	309	509	551	611
ENSG00000268171	AC068620.1	0	1	0	0	2	0	2	3	0	0	0	0
ENSG00000223908	AC068657.2	0	1	1	0	2	0	0	0	0	0	0	0
ENSG00000214432	AC068831.10	0	0	0	0	0	0	0	1	0	0	0	0
ENSG00000259661	AC068831.15	271	232	220	397	408	359	145	159	155	150	159	171
ENSG00000224441	AC068831.3	1	0	0	0	0	0	0	0	0	0	0	0
ENSG00000258384	AC068831.6	23	26	26	21	27	32	19	17	22	30	28	26
ENSG00000260415	AC068987.1	0	1	0	0	0	0	0	0	0	1	0	0
ENSG00000227433	AC069213.4	0	0	0	0	0	0	0	0	0	1	1	0
ENSG00000237418	AC069257.6	0	0	0	0	1	0	0	0	0	0	0	1
ENSG00000228028	AC069257.8	1	0	0	1	0	0	0	0	0	0	0	0
ENSG00000189229	AC069277.2	0	0	0	0	0	0	1	0	0	0	0	0
ENSG00000267242	AC069278.4	0	0	2	1	1	1	0	0	1	0	1	0
ENSG00000225507	AC069282.6	29	21	28	10	27	18	39	46	39	24	27	27
ENSG00000232495	AC069287.1	0	0	0	0	0	0	1	0	0	0	0	0
ENSG00000224298	AC069363.1	0	0	0	1	0	0	0	0	0	0	0	0
ENSG00000249240	AC069368.3	0	0	1	0	0	1	5	1	0	0	0	5
ENSG00000229178	AC069513.4	12	9	6	9	5	11	27	22	17	17	9	8
ENSG00000269165	AC069547.1	25	30	26	33	26	19	20	7	7	16	11	12
ENSG00000269700	AC069547.2	1	1	1	0	3	2	2	1	1	2	0	1
ENSG00000229267	AC072062.1	0	0	0	0	0	0	0	1	2	0	0	0
ENSG00000235499	AC073046.25	1	0	0	0	0	0	0	0	2	0	2	1
ENSG00000228446	AC073052.1	0	0	0	0	0	1	0	1	0	0	1	1
ENSG00000228335	AC073063.10	0	5	5	2	0	0	1	3	0	0	1	0
ENSG00000229172	AC073065.3	1	1	1	4	3	4	0	0	0	0	0	0
ENSG00000237471	AC073115.6	0	0	0	0	0	1	0	0	0	0	0	0
ENSG00000229628	AC073115.7	0	0	1	0	0	0	0	0	0	0	0	0
ENSG00000228135	AC073128.10	2	0	0	0	0	0	0	0	0	0	0	0
ENSG00000237870	AC073130.1	0	0	0	0	0	0	0	0	2	0	0	1
ENSG00000243243	AC073130.3	1	0	0	0	1	0	0	2	0	0	0	0
ENSG00000232783	AC073135.3	0	0	0	0	0	0	1	0	0	0	0	0
ENSG00000235574	AC073150.6	0	0	0	0	0	0	0	0	0	0	0	1
ENSG00000234722	AC073236.3	0	0	0	0	1	0	0	0	0	0	0	1
ENSG00000237126	AC073254.1	95	97	99	116	135	152	93	79	120	46	52	43
ENSG00000234690	AC073283.4	0	0	0	0	0	1	0	0	0	0	0	0
ENSG00000225187	AC073283.7	0	0	0	0	0	0	1	1	1	0	1	1
ENSG00000225918	AC073331.2	1	0	0	0	0	0	0	0	0	0	0	0
ENSG00000235837	AC073333.8	17	24	17	31	21	39	27	22	32	22	13	11
ENSG00000231840	AC073342.12	0	5	0	2	1	1	0	0	0	0	0	0
ENSG00000198580	AC073343.1	0	0	0	0	0	0	0	0	0	1	0	0
ENSG00000228010	AC073343.13	0	0	0	1	0	1	0	2	0	0	0	0
ENSG00000265245	AC073343.2	0	1	0	0	0	0	0	0	0	0	0	0
ENSG00000236047	AC073410.1	0	0	0	0	0	0	0	0	0	0	1	0
ENSG00000227265	AC073464.4	0	0	0	1	0	0	0	0	0	0	0	0
ENSG00000232044	AC073479.1	0	0	0	0	1	0	0	0	0	0	0	0
ENSG00000255863	AC073610.5	2	7	2	6	6	0	0	0	0	0	0	0
ENSG00000228802	AC073641.2	21	16	23	26	31	22	18	16	23	9	19	25
ENSG00000237655	AC073834.3	42	41	54	8	14	20	32	19	54	16	18	19
ENSG00000214142	AC073842.18	0	0	0	0	0	0	1	0	0	0	0	0
ENSG00000217950	AC073869.20	0	0	0	1	0	0	0	0	0	0	0	0
ENSG00000225146	AC073957.15	0	0	2	0	0	1	3	2	2	2	1	2
ENSG00000205334	AC074091.13	0	1	0	0	2	0	16	6	7	11	7	5
ENSG00000234072	AC074117.10	16	15	10	23	18	8	18	12	19	17	18	22
ENSG00000225975	AC074138.3	0	0	0	0	0	0	0	0	1	2	0	2
ENSG00000237452	AC074212.3	0	0	0	0	0	0	1	0	0	2	0	2
ENSG00000259605	AC074212.5	260	267	238	187	155	174	518	505	610	478	437	521
ENSG00000267395	AC074212.6	4	1	3	3	4	2	18	14	19	15	19	11
ENSG00000213963	AC074286.1	1	2	5	0	1	0	3	1	1	0	1	4
ENSG00000228015	AC074338.5	0	0	0	0	0	0	0	2	0	0	0	0
ENSG00000205971	AC074389.6	0	0	0	0	0	0	1	0	3	1	3	2
ENSG00000236081	AC074389.9	0	0	0	0	0	0	4	1	1	0	1	2
ENSG00000204929	AC074391.1	0	0	0	0	0	0	1	0	0	0	0	0
ENSG00000232788	AC078883.3	8	3	8	3	2	4	0	0	1	0	0	0
ENSG00000226963	AC078883.4	20	31	33	28	19	32	3	6	4	4	4	2
ENSG00000213985	AC078899.1	0	0	0	0	0	0	1	0	0	0	0	0
ENSG00000225365	AC078942.1	0	0	1	0	0	0	0	0	0	0	0	0
ENSG00000233611	AC079135.1	0	0	0	0	0	0	29	34	45	36	37	35
ENSG00000227210	AC079145.4	0	0	0	0	0	0	1	1	0	0	0	0
ENSG00000269657	AC079210.1	0	0	2	0	1	0	1	0	0	0	0	0
ENSG00000222043	AC079305.10	77	55	34	29	28	32	159	109	60	87	68	79
ENSG00000229337	AC079305.8	0	0	0	0	0	0	0	0	0	0	1	0
ENSG00000226757	AC079341.1	0	0	0	0	0	0	0	0	1	0	0	0
ENSG00000182329	AC079354.1	0	1	0	0	1	0	3	1	0	0	0	1
ENSG00000248134	AC079395.1	0	0	0	0	0	0	0	0	0	0	0	1
ENSG00000272214	AC079602.1	1	0	0	0	1	0	0	0	1	0	0	0
ENSG00000196096	AC079610.2	0	0	0	0	0	0	0	0	1	0	0	0
ENSG00000232581	AC079742.4	389	407	419	226	207	196	261	238	286	237	236	219
ENSG00000225449	AC079776.7	8	3	8	4	5	3	1	5	3	1	1	0
ENSG00000235779	AC079779.5	0	0	0	0	0	0	0	1	0	0	0	0
ENSG00000227061	AC079779.7	0	0	0	0	0	0	4	0	1	0	0	0
ENSG00000236654	AC079780.3	0	0	0	0	0	0	1	0	0	0	0	0
ENSG00000226744	AC079781.5	1	0	0	0	0	0	0	0	0	1	1	3
ENSG00000232097	AC079781.8	0	0	0	0	0	0	0	0	0	1	0	0
ENSG00000225214	AC079790.2	0	1	0	0	0	0	0	0	0	0	0	0
ENSG00000226473	AC079807.1	0	0	0	0	0	0	0	0	1	0	0	0
ENSG00000233230	AC079807.2	1	1	1	0	4	1	6	0	3	3	5	8
ENSG00000236549	AC079807.3	2	2	1	0	0	0	2	2	2	0	1	1
ENSG00000230773	AC079807.4	0	0	0	0	0	0	3	0	0	0	0	0
ENSG00000231747	AC079922.2	0	0	0	0	0	0	1	0	0	0	0	0
ENSG00000237753	AC079922.3	6	4	5	10	6	11	6	4	5	6	5	3
ENSG00000239776	AC079949.1	0	0	0	0	0	0	0	0	0	1	0	0
ENSG00000230621	AC080002.1	0	0	0	0	0	0	2	0	0	3	0	3
ENSG00000225406	AC080125.1	3	1	0	0	0	0	0	0	0	0	0	0
ENSG00000203644	AC083799.1	1	4	4	1	1	2	6	2	13	4	3	5
ENSG00000259820	AC083843.1	0	0	0	0	0	0	0	1	1	0	0	0
ENSG00000226621	AC083855.5	2	1	0	0	0	1	0	0	0	0	0	0
ENSG00000237821	AC083873.4	2	0	1	0	0	0	1	1	0	0	0	0
ENSG00000235429	AC083875.2	0	0	1	0	0	0	1	0	0	2	1	2
ENSG00000232729	AC083884.8	31	28	39	45	47	37	32	50	52	37	29	47
ENSG00000204745	AC083899.3	3	1	3	6	4	7	2	6	4	0	7	0
ENSG00000225111	AC083900.1	0	0	0	0	1	0	0	0	0	0	0	0
ENSG00000224875	AC083949.1	16	21	22	15	17	22	39	48	58	54	42	51
ENSG00000212694	AC084018.1	21	18	12	15	3	7	24	10	18	27	19	22
ENSG00000253190	AC084082.3	0	4	3	2	3	6	3	2	5	2	1	2
ENSG00000232600	AC084125.4	8	7	4	17	7	13	3	3	3	7	3	3
ENSG00000267163	AC084219.3	29	18	31	34	14	26	49	31	43	69	74	76
ENSG00000186019	AC084219.4	271	243	278	306	252	250	459	430	537	529	600	614
ENSG00000226377	AC084809.2	3	1	0	1	0	1	1	0	0	0	1	0
ENSG00000232344	AC087163.2	0	1	0	1	0	0	0	1	1	1	0	1
ENSG00000176305	AC087269.1	7	0	4	0	2	1	0	2	1	0	0	0
ENSG00000235530	AC087294.2	0	0	0	0	2	0	0	0	0	2	0	3
ENSG00000196737	AC087392.1	0	0	0	0	0	0	0	0	0	0	0	1
ENSG00000227685	AC087499.10	0	0	0	0	0	0	0	0	1	0	0	0
ENSG00000225751	AC087501.1	1	0	0	0	0	0	0	0	0	0	0	0
ENSG00000268310	AC087645.1	399	340	307	410	482	473	686	876	1280	1018	1072	1125
ENSG00000224002	AC090099.2	19	17	16	12	15	19	45	61	54	11	8	8
ENSG00000232941	AC090186.1	75	69	80	42	45	43	200	176	189	182	184	216
ENSG00000235672	AC090286.2	0	0	0	1	0	0	0	0	0	0	0	0
ENSG00000213165	AC090425.1	0	0	0	0	2	1	1	0	0	0	0	0
ENSG00000234805	AC090505.5	1	0	0	0	1	1	0	0	0	0	0	0
ENSG00000237222	AC090505.6	0	0	0	1	0	0	0	0	0	0	0	0
ENSG00000250404	AC090587.2	0	1	0	0	0	1	0	0	0	1	0	0
ENSG00000229368	AC090587.4	2	0	0	1	0	1	1	1	1	0	0	0
ENSG00000228661	AC090587.5	2	0	1	2	0	0	1	1	0	1	1	2
ENSG00000214708	AC090616.2	45	43	44	62	51	48	51	68	89	93	95	112
ENSG00000236838	AC090617.1	0	0	0	0	0	0	0	0	0	0	0	1
ENSG00000235300	AC090627.1	0	0	1	0	0	1	0	0	0	0	0	0
ENSG00000230593	AC090804.1	1	0	0	0	1	0	0	0	1	0	0	0
ENSG00000224728	AC090945.1	0	0	0	0	0	0	1	0	1	0	1	2
ENSG00000230172	AC090957.2	0	1	0	0	0	0	0	0	0	0	0	0
ENSG00000236234	AC091132.1	0	1	1	4	4	3	2	2	0	2	0	5
ENSG00000230532	AC091133.1	2	3	1	3	1	1	1	1	4	1	2	2
ENSG00000235085	AC091153.4	0	0	0	0	0	0	0	0	1	0	0	0
ENSG00000256586	AC091171.1	6	8	6	0	0	0	0	3	13	4	4	0
ENSG00000230113	AC091177.1	1	1	2	1	0	1	3	6	1	10	8	13
ENSG00000225026	AC091492.2	0	1	0	0	0	0	0	1	0	0	0	0
ENSG00000224079	AC091729.7	1	0	1	0	0	0	1	0	1	0	1	0
ENSG00000226291	AC091729.8	0	0	1	0	0	0	2	1	0	0	0	0
ENSG00000229043	AC091729.9	7	3	5	2	3	1	15	15	12	7	2	7
ENSG00000231560	AC091814.3	0	1	0	2	1	1	0	0	0	0	0	0
ENSG00000215196	AC091878.1	0	0	0	0	0	0	1	0	0	0	0	0
ENSG00000256390	AC092143.1	1	6	0	0	2	0	0	0	0	0	0	0
ENSG00000233296	AC092159.2	8	12	17	16	19	16	13	10	10	24	8	13
ENSG00000230552	AC092162.1	0	2	0	0	0	0	0	0	0	0	0	0
ENSG00000188365	AC092171.2	7	6	1	2	2	3	7	1	3	3	6	3
ENSG00000230733	AC092171.4	471	535	492	976	940	836	443	409	586	387	402	460
ENSG00000267290	AC092192.1	7	0	0	1	1	0	3	0	0	0	2	1
ENSG00000223486	AC092198.1	2	2	1	2	1	3	2	2	0	2	2	2
ENSG00000228629	AC092295.4	0	0	0	0	0	0	0	1	0	0	0	0
ENSG00000233527	AC092295.7	0	0	0	0	0	0	9	11	12	9	9	20
ENSG00000267029	AC092299.7	21	34	19	29	42	35	8	7	2	6	4	7
ENSG00000269148	AC092301.3	2	1	2	3	1	4	1	1	2	4	4	1
ENSG00000230872	AC092338.5	2	1	0	0	0	0	0	2	0	0	2	2
ENSG00000235493	AC092415.1	0	1	0	0	0	0	0	0	0	0	0	0
ENSG00000229948	AC092431.2	1	0	2	0	1	1	4	1	2	0	0	3
ENSG00000227189	AC092535.3	0	1	0	0	0	0	2	0	0	0	0	0
ENSG00000236204	AC092594.1	0	0	0	2	0	0	4	5	5	3	5	4
ENSG00000248254	AC092597.3	22	19	17	25	27	19	9	11	6	3	2	4
ENSG00000213935	AC092610.12	0	0	0	0	0	0	0	1	0	0	0	0
ENSG00000227542	AC092614.2	0	1	0	0	1	1	0	0	0	0	0	0
ENSG00000225493	AC092619.1	7	5	17	3	1	2	0	0	0	0	0	0
ENSG00000241772	AC092620.2	0	0	0	0	1	0	0	0	0	0	0	0
ENSG00000227176	AC092641.2	0	1	4	1	2	0	1	0	1	1	2	2
ENSG00000204872	AC092653.5	1	0	0	0	0	0	0	0	0	0	0	0
ENSG00000233370	AC092664.1	1	1	0	1	0	0	0	0	1	0	1	0
ENSG00000230393	AC092667.2	0	0	0	0	0	0	0	1	0	0	0	0
ENSG00000232164	AC092669.3	0	0	0	1	0	0	0	0	0	0	0	0
ENSG00000222000	AC092675.3	0	1	0	2	4	2	1	0	0	0	0	2
ENSG00000234818	AC092687.5	8	6	8	9	6	4	13	7	17	17	4	9
ENSG00000213872	AC092798.2	1	1	2	0	1	0	0	2	0	2	1	3
ENSG00000203691	AC092811.1	10	10	9	15	20	13	8	9	5	13	23	10
ENSG00000233757	AC092835.2	0	2	2	2	1	0	0	0	0	0	0	0
ENSG00000267979	AC092964.2	1	0	0	1	1	2	1	0	1	1	0	0
ENSG00000236238	AC093106.4	0	0	0	0	0	0	0	0	1	0	0	0
ENSG00000236281	AC093106.5	0	0	0	0	0	0	1	2	1	3	2	1
ENSG00000213261	AC093106.7	0	0	1	0	0	0	1	0	0	0	1	2
ENSG00000223718	AC093107.7	0	0	0	0	0	0	0	1	0	1	1	0
ENSG00000238018	AC093110.3	106	101	132	76	56	41	29	36	47	41	48	49
ENSG00000269175	AC093157.1	308	291	283	219	226	199	330	303	336	303	284	324
ENSG00000246575	AC093162.5	1	3	1	0	1	1	1	0	0	0	0	2
ENSG00000228615	AC093166.3	0	0	0	0	0	0	1	0	0	1	0	1
ENSG00000230958	AC093166.4	1	0	0	0	0	1	0	0	0	0	0	0
ENSG00000268791	AC093323.1	0	0	0	0	0	0	1	1	0	0	0	0
ENSG00000170846	AC093323.3	21	19	16	26	24	23	36	30	36	17	10	16
ENSG00000226383	AC093375.1	0	0	0	0	0	2	0	0	1	0	0	0
ENSG00000233654	AC093388.3	0	0	2	1	0	0	1	0	0	1	0	0
ENSG00000231890	AC093391.2	4	6	6	6	7	6	9	8	12	12	9	15
ENSG00000235257	AC093415.2	0	0	1	0	0	0	0	1	2	0	1	1
ENSG00000228242	AC093495.4	1	2	7	0	2	3	1	1	0	0	2	0
ENSG00000255647	AC093510.1	0	0	0	0	0	0	1	0	0	0	0	0
ENSG00000234231	AC093616.4	0	6	1	6	0	6	30	24	6	1	0	12
ENSG00000241269	AC093620.5	3	3	2	2	1	3	2	2	1	2	1	2
ENSG00000240859	AC093627.10	2	2	1	0	1	2	0	1	0	0	0	0
ENSG00000240093	AC093627.12	2	0	1	0	0	0	1	1	1	2	1	0
ENSG00000242474	AC093627.9	0	1	0	0	0	0	0	0	0	1	0	0
ENSG00000226423	AC093642.4	0	0	0	0	0	0	0	0	0	1	0	0
ENSG00000220804	AC093642.5	4	5	10	1	2	0	3	0	0	1	0	0
ENSG00000256604	AC093668.2	0	1	1	2	0	0	0	0	0	0	0	0
ENSG00000232533	AC093673.5	4	3	2	4	5	1	0	5	8	0	1	2
ENSG00000269559	AC093677.1	28	31	26	19	15	18	50	50	51	42	23	31
ENSG00000223522	AC093690.1	3	4	5	2	4	7	10	6	4	6	14	6
ENSG00000213222	AC093724.2	225	194	190	180	133	149	162	143	182	103	114	107
ENSG00000233845	AC093732.1	0	1	0	0	0	0	0	1	0	0	0	2
ENSG00000220256	AC093802.1	0	0	1	0	0	0	0	0	0	0	0	0
ENSG00000225205	AC093818.1	19	29	32	12	14	14	19	22	11	12	17	24
ENSG00000152117	AC093838.4	6	2	6	4	1	2	6	8	2	0	2	3
ENSG00000224819	AC093843.1	0	0	0	0	0	0	0	0	2	0	0	0
ENSG00000236732	AC094019.4	0	0	1	0	1	0	0	0	0	0	0	2
ENSG00000236078	AC095067.1	0	0	0	0	0	0	2	1	0	0	0	0
ENSG00000225057	AC096574.4	6	9	4	8	6	6	21	5	10	14	18	20
ENSG00000227107	AC096574.5	6	8	12	8	6	5	10	11	17	12	11	18
ENSG00000234536	AC096582.7	0	0	0	0	0	0	1	0	0	0	0	0
ENSG00000229750	AC096649.2	22	12	15	12	6	4	28	29	22	29	15	23
ENSG00000230651	AC096655.2	0	0	0	0	0	0	0	0	0	0	1	1
ENSG00000228872	AC096664.2	0	1	0	1	0	0	0	0	0	0	0	0
ENSG00000269690	AC096677.1	1	0	0	0	0	0	0	1	0	0	0	0
ENSG00000244567	AC096772.6	0	0	0	0	0	0	1	0	0	1	0	0
ENSG00000237551	AC096775.2	1	0	0	1	1	0	0	0	0	3	0	0
ENSG00000224618	AC096921.2	1	0	0	0	1	0	0	0	0	0	0	0
ENSG00000176354	AC097359.1	0	0	1	0	0	0	0	0	0	1	0	0
ENSG00000259848	AC097374.2	2	4	6	4	6	8	0	0	1	1	1	1
ENSG00000228919	AC097381.1	123	107	92	70	56	68	72	61	67	33	26	55
ENSG00000234193	AC097461.4	0	1	1	1	1	0	1	0	0	3	0	1
ENSG00000224090	AC097468.4	0	1	0	0	1	0	0	0	0	0	0	0
ENSG00000237877	AC097500.2	0	0	0	0	1	0	1	0	0	0	0	0
ENSG00000233045	AC097523.1	0	0	0	0	0	0	0	0	0	1	0	0
ENSG00000234645	AC097523.2	0	0	0	1	0	0	0	0	0	0	0	0
ENSG00000237939	AC097523.3	0	0	0	0	0	0	0	0	1	0	0	1
ENSG00000230697	AC097635.4	0	0	0	1	0	0	1	0	0	0	0	0
ENSG00000178972	AC097658.1	14	14	19	15	8	9	24	18	21	10	11	8
ENSG00000236432	AC097662.2	6	0	2	2	3	0	1	0	0	0	0	0
ENSG00000236530	AC097711.1	1	0	0	0	0	0	2	2	2	1	0	1
ENSG00000228043	AC097721.2	0	0	0	0	3	1	2	0	0	0	0	0
ENSG00000226833	AC097724.3	1	1	3	0	3	2	0	0	0	0	0	0
ENSG00000213846	AC098614.2	0	0	0	0	3	0	11	10	7	1	3	6
ENSG00000233766	AC098617.1	0	0	0	1	0	0	160	227	424	187	139	203
ENSG00000235042	AC098820.2	14	11	9	10	5	4	4	4	8	1	2	1
ENSG00000232485	AC098820.3	0	0	0	0	0	0	0	0	0	0	0	1
ENSG00000241520	AC098820.4	0	0	0	0	0	0	0	1	0	0	0	0
ENSG00000232202	AC098824.6	1	0	0	0	0	0	0	1	1	0	1	2
ENSG00000234378	AC098828.2	0	0	0	0	2	1	0	0	0	0	0	0
ENSG00000203652	AC099048.1	0	0	0	0	0	0	0	0	2	0	0	0
ENSG00000183900	AC099522.1	31	26	33	101	66	71	102	92	99	45	29	27
ENSG00000259970	AC099668.5	0	1	0	1	0	0	2	0	0	0	1	4
ENSG00000228133	AC099684.1	0	0	0	0	0	0	1	2	2	1	2	2
ENSG00000224738	AC099850.1	58	62	55	77	46	69	78	65	101	108	73	92
ENSG00000259635	AC100830.3	0	0	0	0	0	1	0	0	1	0	0	0
ENSG00000265967	AC100830.4	1	0	0	0	0	1	0	0	1	1	0	3
ENSG00000225981	AC102953.4	0	0	0	0	0	0	0	0	0	0	0	1
ENSG00000229203	AC103564.7	0	0	0	0	0	0	1	0	0	0	0	0
ENSG00000229387	AC103801.2	390	367	356	231	214	207	27	34	41	57	57	67
ENSG00000254879	AC103828.1	0	0	0	0	0	0	0	0	0	0	1	0
ENSG00000225151	AC103965.1	28	44	28	42	16	18	48	18	28	25	31	42
ENSG00000269558	AC104057.1	1	3	2	2	0	0	0	1	0	0	0	0
ENSG00000233847	AC104113.3	1	0	0	0	0	0	0	1	0	0	0	1
ENSG00000225420	AC104134.2	663	624	666	783	371	346	929	736	400	293	247	298
ENSG00000236209	AC104135.2	0	0	0	0	0	0	1	1	0	1	0	0
ENSG00000204792	AC104135.3	37	29	35	28	26	28	0	0	0	0	0	0
ENSG00000230836	AC104135.4	0	0	0	0	1	0	1	0	0	0	0	0
ENSG00000213849	AC104306.1	0	0	0	0	0	0	0	0	0	1	0	0
ENSG00000236198	AC104395.2	0	0	0	0	0	0	0	0	1	0	0	0
ENSG00000266941	AC104532.3	2	2	5	3	2	1	4	0	0	1	0	2
ENSG00000267571	AC104532.4	4	4	1	3	1	2	8	9	8	8	7	6
ENSG00000268756	AC104534.2	0	1	0	0	0	0	1	0	0	0	0	1
ENSG00000268083	AC104534.3	2	0	0	0	0	0	0	0	0	0	8	3
ENSG00000225496	AC104651.2	1	0	1	0	0	0	0	0	1	0	0	0
ENSG00000228857	AC104653.1	0	0	0	0	0	0	0	0	2	0	0	0
ENSG00000231851	AC104655.2	50	50	51	60	78	51	80	73	86	93	98	91
ENSG00000234949	AC104667.3	0	0	1	0	0	0	0	1	2	0	0	0
ENSG00000229951	AC104695.3	0	0	0	0	0	0	0	1	0	1	1	0
ENSG00000227938	AC104695.4	0	0	0	0	0	0	1	1	2	0	0	0
ENSG00000224220	AC104699.1	0	0	0	0	0	0	2	0	0	0	0	0
ENSG00000236049	AC104777.2	0	2	0	1	0	0	0	0	0	0	0	0
ENSG00000237220	AC104777.3	0	1	0	0	0	0	0	0	0	0	0	0
ENSG00000236651	AC104801.1	1	0	0	0	0	0	0	0	0	0	0	0
ENSG00000268485	AC104841.2	2507	2541	2538	1332	1142	1132	2854	2543	2827	1134	1178	1309
ENSG00000238149	AC104978.1	0	1	1	0	0	0	1	0	0	0	0	0
ENSG00000229498	AC105053.3	0	0	0	2	0	0	0	0	0	0	0	0
ENSG00000232504	AC105053.4	0	0	0	0	1	0	0	0	0	0	0	0
ENSG00000227007	AC105253.1	0	0	0	0	0	0	0	0	1	0	0	0
ENSG00000228141	AC105339.1	0	0	0	0	0	0	0	0	0	1	0	0
ENSG00000234429	AC105342.1	0	0	0	0	0	0	1	0	0	0	0	0
ENSG00000238062	AC105344.2	0	1	2	1	0	0	0	0	0	0	0	0
ENSG00000231079	AC105402.4	0	1	1	0	0	0	0	0	0	0	0	0
ENSG00000227252	AC105760.2	1	1	1	1	0	2	2	1	4	1	0	4
ENSG00000236007	AC105921.5	0	1	0	0	0	0	0	0	0	0	0	0
ENSG00000262721	AC106782.20	6	7	7	3	1	3	22	15	23	5	16	11
ENSG00000223652	AC106786.1	2	0	0	0	0	1	0	1	1	0	0	0
ENSG00000253519	AC106801.1	0	0	0	0	1	0	1	0	0	0	0	0
ENSG00000228368	AC106873.4	0	1	0	0	0	1	0	0	0	0	2	0
ENSG00000225410	AC107016.1	26	16	26	10	27	3	10	14	12	7	3	9
ENSG00000265039	AC107016.2	0	0	0	0	0	0	0	0	0	1	0	0
ENSG00000232013	AC107021.1	5	1	5	8	4	6	2	2	2	0	0	1
ENSG00000224844	AC107079.1	0	0	1	1	0	0	2	0	0	0	2	0
ENSG00000236498	AC107081.5	1283	1114	1264	1069	1058	1035	2051	1822	2007	1273	1358	1410
ENSG00000250111	AC107982.4	1	0	4	0	0	2	0	6	0	0	0	0
ENSG00000227077	AC107983.4	0	0	1	0	0	0	0	0	0	1	1	0
ENSG00000241525	AC108004.3	5	12	12	3	3	4	34	45	39	14	12	13
ENSG00000229831	AC108039.3	0	0	0	0	0	0	0	1	0	0	0	0
ENSG00000229173	AC108059.4	4	3	4	0	2	1	1	2	1	0	0	1
ENSG00000177822	AC108142.1	0	0	0	0	0	0	1	0	0	0	0	0
ENSG00000230499	AC108463.1	0	1	0	5	8	6	9	14	12	11	7	9
ENSG00000227992	AC108463.2	0	0	0	1	0	1	1	0	2	0	0	0
ENSG00000234171	AC108488.3	13	7	12	3	4	3	19	18	18	4	5	2
ENSG00000242282	AC108488.4	1	0	1	0	0	1	0	0	0	0	0	0
ENSG00000244675	AC108676.1	0	1	2	0	0	0	0	1	2	0	0	0
ENSG00000237666	AC108868.3	0	0	0	0	1	0	0	0	0	0	0	0
ENSG00000226065	AC108938.2	339	439	597	161	198	180	36	75	91	18	42	60
ENSG00000227495	AC109333.10	0	1	0	5	1	1	2	1	1	6	2	1
ENSG00000259192	AC109631.1	5	6	2	3	1	1	1	4	0	1	2	2
ENSG00000234945	AC109828.1	117	111	115	90	77	98	87	91	126	103	97	115
ENSG00000233438	AC109829.1	0	0	2	2	1	0	0	2	1	1	0	1
ENSG00000224232	AC110299.5	0	1	1	0	0	1	1	0	0	0	0	0
ENSG00000268788	AC110615.1	125	88	76	92	80	79	76	80	83	87	86	106
ENSG00000255735	AC110619.1	1	2	0	3	2	0	2	1	6	2	11	11
ENSG00000218416	AC110619.2	3	1	4	3	6	4	18	8	0	8	12	11
ENSG00000269302	AC110771.1	0	1	1	0	1	0	0	1	0	0	1	1
ENSG00000176349	AC110781.3	0	5	6	7	5	3	8	9	1	6	8	14
ENSG00000226789	AC110926.4	0	0	0	0	0	1	1	3	1	6	0	1
ENSG00000224011	AC111155.1	0	0	0	0	0	0	0	1	0	0	0	1
ENSG00000232724	AC111186.1	7	9	8	7	6	6	20	27	35	19	12	27
ENSG00000235424	AC112211.3	0	0	0	0	0	0	1	0	0	0	0	0
ENSG00000230650	AC112229.1	0	0	2	0	0	0	0	0	0	0	0	0
ENSG00000175772	AC112229.7	0	2	0	1	0	0	0	0	0	0	0	0
ENSG00000228277	AC112518.3	0	0	0	0	0	0	4	1	2	1	3	3
ENSG00000222022	AC112721.1	0	0	0	0	0	0	3	0	1	0	0	0
ENSG00000222032	AC112721.2	0	0	0	0	0	0	0	0	1	0	0	0
ENSG00000233223	AC113189.5	24	24	24	100	64	61	22	9	4	8	9	6
ENSG00000268950	AC114494.1	7	1	6	1	3	6	0	0	1	1	1	1
ENSG00000212768	AC114546.1	1531	1193	1380	1124	1113	823	1250	1151	1404	1193	1417	1556
ENSG00000235351	AC114730.11	22	28	30	17	17	25	22	18	16	23	24	21
ENSG00000224272	AC114730.3	0	0	0	0	0	0	5	4	0	2	2	4
ENSG00000215023	AC114730.5	0	0	0	0	0	0	2	1	3	2	0	2
ENSG00000234793	AC114730.7	36	32	30	20	18	14	17	12	11	13	20	22
ENSG00000215692	AC114730.8	55	65	61	101	71	83	62	85	75	73	65	75
ENSG00000229682	AC114755.5	0	0	0	1	0	0	0	0	0	0	0	0
ENSG00000235486	AC114755.7	0	0	1	0	0	0	0	0	0	0	0	0
ENSG00000230569	AC114763.1	0	0	0	0	1	0	1	1	0	0	1	0
ENSG00000239498	AC114765.1	0	0	0	0	0	0	1	1	3	0	0	0
ENSG00000216867	AC114776.1	0	0	0	0	1	0	1	0	2	0	0	0
ENSG00000178836	AC114812.5	0	0	0	0	0	0	0	0	0	0	0	1
ENSG00000248114	AC114812.9	0	0	0	0	0	0	0	0	1	0	0	0
ENSG00000248341	AC115115.2	0	0	0	0	1	0	2	0	0	0	0	0
ENSG00000204620	AC115618.1	22	23	18	26	21	22	132	95	112	120	100	123
ENSG00000233991	AC116050.1	0	0	1	0	0	0	0	0	0	0	0	0
ENSG00000238160	AC116366.5	0	0	0	1	0	0	0	0	0	0	0	0
ENSG00000234290	AC116366.6	17	16	15	7	12	4	9	7	17	4	9	8
ENSG00000269402	AC116407.2	0	0	2	2	1	0	1	0	1	0	0	0
ENSG00000268175	AC117395.1	1	1	1	1	2	4	11	11	12	4	6	3
ENSG00000212999	AC117834.1	474	366	551	167	138	150	0	0	0	0	0	0
ENSG00000229782	AC118754.4	0	0	0	1	0	0	0	0	0	0	0	0
ENSG00000268313	AC119673.1	4496	4062	4262	4181	4515	4036	9550	10172	13421	9274	10307	11380
ENSG00000213002	AC120194.1	3374	2205	3914	814	963	774	1149	857	779	315	463	449
ENSG00000197815	AC122129.1	4	1	3	0	3	0	2	1	2	0	1	3
ENSG00000234038	AC123768.3	1	0	1	0	0	0	0	0	1	1	0	0
ENSG00000262728	AC123768.4	0	0	2	2	0	1	5	6	1	1	3	3
ENSG00000231536	AC123886.2	0	0	0	0	0	0	0	0	0	1	0	0
ENSG00000227479	AC124861.1	0	0	0	0	0	0	1	0	0	0	0	0
ENSG00000231395	AC124914.3	0	0	0	0	0	0	1	1	0	0	0	1
ENSG00000226155	AC124944.3	1	0	2	0	0	1	0	0	0	0	0	0
ENSG00000231259	AC125232.1	19	20	26	16	13	0	23	15	9	19	11	13
ENSG00000223602	AC125634.1	0	0	1	0	0	0	0	1	0	0	0	0
ENSG00000268367	AC126614.1	1	0	2	1	0	0	0	0	1	0	0	0
ENSG00000175911	AC127496.1	0	0	0	1	2	0	0	0	0	0	0	0
ENSG00000230732	AC127904.2	1	0	0	0	0	0	0	0	0	0	0	1
ENSG00000235147	AC128677.3	0	0	1	0	0	0	0	0	0	0	0	0
ENSG00000250443	AC128709.1	0	1	0	1	0	0	0	0	0	0	0	0
ENSG00000237167	AC128709.2	0	0	0	0	0	0	0	1	0	0	0	0
ENSG00000235126	AC128709.3	0	0	0	1	0	0	1	0	0	0	0	0
ENSG00000229912	AC128709.4	0	0	0	0	0	1	0	0	0	0	0	0
ENSG00000214999	AC129492.6	7	12	9	5	7	3	3	3	3	4	10	7
ENSG00000184906	AC129778.2	2	2	0	3	1	0	2	0	0	0	0	0
ENSG00000224567	AC129778.5	0	0	0	2	0	0	0	2	0	0	0	0
ENSG00000225380	AC129778.7	0	0	0	0	0	1	0	1	1	0	0	0
ENSG00000238184	AC129929.5	1	1	0	0	0	2	0	1	1	4	0	1
ENSG00000235778	AC130360.8	0	0	0	0	0	0	0	1	0	0	0	1
ENSG00000267986	AC130469.2	0	0	0	0	0	0	0	0	0	1	1	0
ENSG00000214525	AC130709.1	0	3	5	2	5	2	0	1	0	0	1	1
ENSG00000253864	AC131025.8	0	0	0	0	0	0	9	3	1	1	0	0
ENSG00000233806	AC131097.3	0	0	0	0	0	0	0	0	0	1	0	0
ENSG00000203418	AC131571.1	1	0	0	1	0	0	0	0	0	0	0	0
ENSG00000203504	AC131571.2	15	15	15	29	36	33	0	0	0	0	0	0
ENSG00000183562	AC131971.1	53	53	37	52	40	38	57	31	18	43	60	57
ENSG00000247270	AC132186.1	0	0	0	1	2	0	4	3	0	0	0	0
ENSG00000268403	AC132192.1	0	1	0	0	1	0	1	0	1	0	0	0
ENSG00000238008	AC132515.1	0	0	0	0	0	0	0	0	0	0	0	1
ENSG00000184551	AC132872.1	111	124	80	151	123	97	169	125	139	154	108	131
ENSG00000268852	AC132872.2	4	8	6	9	6	6	17	14	14	16	17	23
ENSG00000228073	AC133106.2	0	0	0	0	0	0	1	4	2	2	2	1
ENSG00000228989	AC133528.2	0	0	0	0	0	0	3	2	0	1	2	0
ENSG00000214354	AC133644.3	1	0	0	0	0	0	0	1	1	1	0	0
ENSG00000233221	AC133785.1	0	0	2	0	0	0	1	1	1	0	1	1
ENSG00000268863	AC135048.1	84	87	91	430	374	397	117	123	155	101	98	111
ENSG00000261487	AC135048.13	2	0	1	3	0	2	9	16	6	0	0	8
ENSG00000261124	AC135050.5	3	1	2	0	0	0	1	2	0	3	3	4
ENSG00000198150	AC135178.1	0	0	0	0	0	0	1	2	0	0	0	0
ENSG00000268759	AC135983.2	0	0	1	0	0	0	0	1	1	2	0	0
ENSG00000267950	AC136297.1	32	25	28	61	50	35	16	21	28	24	41	40
ENSG00000268218	AC137932.1	164	189	225	135	114	85	743	563	518	317	319	345
ENSG00000260279	AC137932.5	1	2	2	0	3	1	5	2	2	1	1	0
ENSG00000261253	AC137932.6	0	4	1	2	4	3	16	9	1	1	4	2
ENSG00000260923	AC137934.1	0	0	1	0	0	0	2	0	0	0	0	0
ENSG00000238035	AC138035.2	1	0	0	1	0	0	0	1	0	0	1	0
ENSG00000256393	AC138123.2	1	0	0	0	0	0	1	0	0	0	0	0
ENSG00000223977	AC138623.1	0	0	0	1	0	0	0	0	0	0	0	0
ENSG00000236558	AC138655.6	2	0	0	3	2	0	3	2	1	0	2	2
ENSG00000256826	AC138744.2	0	5	1	0	0	0	14	5	1	5	3	3
ENSG00000205509	AC138783.11	0	0	3	0	0	3	5	0	0	0	4	0
ENSG00000189011	AC138783.12	2	1	2	0	0	0	0	0	1	0	0	0
ENSG00000203563	AC138951.1	0	0	0	0	0	0	0	0	0	0	0	1
ENSG00000183889	AC138969.4	38	26	46	12	27	15	57	21	32	9	21	48
ENSG00000232938	AC139099.3	3	1	3	1	1	3	2	0	0	0	0	2
ENSG00000262094	AC139099.5	6	7	5	5	5	6	0	0	0	0	0	0
ENSG00000267270	AC139100.2	2	1	2	4	0	2	26	15	8	4	3	2
ENSG00000267251	AC139100.3	40	34	33	22	24	29	18	26	36	24	18	20
ENSG00000255000	AC139103.1	0	0	0	1	0	0	1	0	0	0	0	1
ENSG00000266077	AC139149.1	3	0	1	1	0	0	2	4	3	0	3	1
ENSG00000233812	AC139426.2	2	2	0	0	0	1	2	1	0	0	0	0
ENSG00000227337	AC139452.2	0	0	0	0	0	0	1	0	0	0	0	0
ENSG00000233799	AC139887.4	0	0	0	0	0	0	0	0	1	0	1	0
ENSG00000178162	AC140481.1	0	0	0	0	0	0	1	0	0	0	0	0
ENSG00000257010	AC140481.3	0	0	0	0	0	0	3	0	0	0	0	0
ENSG00000215154	AC141586.5	21	20	20	51	54	20	21	13	19	11	16	14
ENSG00000250986	AC141928.1	0	0	0	0	0	0	1	0	0	0	0	0
ENSG00000249942	AC142293.3	0	0	0	0	0	0	3	1	3	0	0	1
ENSG00000235078	AC142528.1	159	138	140	141	140	143	408	430	584	374	315	358
ENSG00000231969	AC144449.1	30	28	23	26	34	32	48	30	45	43	44	31
ENSG00000228956	AC144521.1	0	0	0	1	0	0	0	0	0	0	0	0
ENSG00000234742	AC144530.1	1	3	1	1	0	1	3	8	2	3	3	3
ENSG00000273117	AC144652.1	0	1	0	1	1	3	0	1	3	3	0	3
ENSG00000261888	AC144831.1	0	0	1	0	0	0	1	1	0	0	2	1
ENSG00000262213	AC144836.1	0	0	0	0	0	0	0	0	1	0	0	0
ENSG00000253490	AC145110.1	0	2	1	0	0	0	0	0	0	0	0	0
ENSG00000265055	AC145343.2	0	0	0	1	0	0	0	0	0	0	0	0
ENSG00000249852	AC145676.2	3	5	3	1	1	4	7	2	4	2	2	1
ENSG00000223855	AC147651.3	1	1	2	1	1	0	1	1	1	1	0	2
ENSG00000237181	AC147651.4	0	0	0	1	0	0	0	0	0	0	1	0
ENSG00000229380	AC147651.5	0	1	0	0	0	0	0	0	0	0	0	0
ENSG00000256546	AC156455.1	3	1	7	4	6	5	0	0	0	0	0	0
ENSG00000230606	AC159540.1	3	1	3	4	5	1	6	8	6	2	0	0
ENSG00000241481	AC159540.2	10	17	16	19	17	12	12	7	13	4	1	3
ENSG00000269396	AC187652.1	0	0	0	0	0	0	0	0	1	0	0	0
ENSG00000249241	AC195454.1	0	0	0	0	0	0	1	0	0	0	0	0
ENSG00000253917	AC226119.5	0	2	0	0	0	0	0	0	0	0	0	0
ENSG00000255748	AC226150.4	0	1	0	5	6	5	13	8	13	10	17	8
ENSG00000251775	ACA59	0	0	0	0	0	0	1	0	1	0	0	0
ENSG00000060971	ACAA1	8	10	12	17	13	13	10	2	9	7	13	14
ENSG00000167315	ACAA2	3	5	6	23	15	17	124	95	118	52	56	49
ENSG00000132142	ACACA	44	33	71	137	131	92	43	37	45	23	22	40
ENSG00000076555	ACACB	1	7	4	0	0	0	6	3	6	3	4	3
ENSG00000111271	ACAD10	7	8	22	15	3	7	9	13	20	5	9	7
ENSG00000240303	ACAD11	493	396	407	490	412	385	587	514	585	527	513	616
ENSG00000151498	ACAD8	22	5	18	30	20	8	10	12	13	5	2	3
ENSG00000177646	ACAD9	41	42	46	54	46	37	70	71	104	75	62	72
ENSG00000115361	ACADL	0	1	0	0	0	0	0	1	0	0	0	0
ENSG00000117054	ACADM	69	58	79	93	57	68	53	62	49	29	41	39
ENSG00000122971	ACADS	7	3	14	8	4	4	6	8	7	9	8	7
ENSG00000196177	ACADSB	21	29	30	12	22	17	29	39	41	16	19	12
ENSG00000072778	ACADVL	195	204	244	315	222	231	418	364	341	191	186	231
ENSG00000157766	ACAN	0	0	1	1	0	0	7	1	0	1	0	0
ENSG00000072818	ACAP1	52	52	44	23	22	21	95	66	46	32	36	41
ENSG00000114331	ACAP2	101	104	157	110	84	69	223	183	198	68	93	109
ENSG00000131584	ACAP3	8	12	8	43	37	31	17	26	23	22	14	27
ENSG00000075239	ACAT1	160	137	204	177	141	135	157	157	185	123	125	161
ENSG00000120437	ACAT2	554	404	575	415	484	436	1017	909	997	347	479	565
ENSG00000182827	ACBD3	107	133	132	173	94	99	278	196	203	106	127	142
ENSG00000181513	ACBD4	12	14	15	14	10	3	14	12	11	6	9	4
ENSG00000107897	ACBD5	47	51	69	85	70	61	72	74	132	59	59	75
ENSG00000135847	ACBD6	57	48	60	67	64	55	96	100	109	60	77	64
ENSG00000176244	ACBD7	3	3	3	0	0	0	3	8	8	1	1	5
ENSG00000110455	ACCS	2	3	4	0	4	2	3	2	3	1	1	1
ENSG00000102977	ACD	9	12	8	24	16	16	37	39	33	15	14	23
ENSG00000159640	ACE	8	5	7	4	5	4	1	0	4	1	0	0
ENSG00000130234	ACE2	1	2	0	0	0	0	0	0	0	0	0	0
ENSG00000177076	ACER2	1	2	4	2	1	4	2	0	2	0	0	0
ENSG00000078124	ACER3	11	4	25	26	17	22	34	24	31	8	19	21
ENSG00000087085	ACHE	0	1	1	2	1	2	7	5	2	6	9	9
ENSG00000100813	ACIN1	205	222	244	458	342	362	471	419	579	450	393	497
ENSG00000144476	ACKR3	0	0	0	0	0	0	2	2	0	0	2	0
ENSG00000129048	ACKR4	0	3	2	0	1	1	7	3	0	9	13	9
ENSG00000131473	ACLY	122	129	222	631	469	453	335	355	444	279	276	366
ENSG00000153086	ACMSD	2	0	1	1	0	0	2	1	1	1	1	0
ENSG00000196636	ACN9	14	6	11	10	6	13	19	14	27	9	6	13
ENSG00000122729	ACO1	27	26	38	62	49	50	40	32	43	27	34	28
ENSG00000100412	ACO2	312	294	296	430	416	400	249	210	238	164	146	151
ENSG00000184227	ACOT1	37	34	29	14	15	19	2	0	3	2	2	1
ENSG00000162390	ACOT11	0	0	0	0	0	0	0	0	0	1	2	0
ENSG00000112304	ACOT13	290	214	319	191	234	182	318	270	281	125	169	180
ENSG00000119673	ACOT2	288	262	286	230	210	227	179	137	204	167	173	162
ENSG00000177465	ACOT4	0	0	0	3	1	1	0	0	0	0	0	0
ENSG00000205669	ACOT6	0	0	0	0	0	1	1	0	0	1	0	0
ENSG00000097021	ACOT7	31	33	46	31	38	28	112	93	131	67	69	51
ENSG00000101473	ACOT8	98	113	120	124	130	117	318	291	368	208	197	263
ENSG00000123130	ACOT9	36	47	48	98	51	50	164	153	164	40	44	58
ENSG00000161533	ACOX1	94	100	121	154	126	141	91	73	114	67	64	79
ENSG00000168306	ACOX2	0	1	0	0	2	1	0	1	1	0	0	0
ENSG00000087008	ACOX3	5	1	2	4	11	4	4	6	11	7	4	3
ENSG00000153093	ACOXL	1	2	0	2	1	0	1	2	0	0	2	0
ENSG00000143727	ACP1	83	81	94	80	56	58	120	117	108	42	63	58
ENSG00000134575	ACP2	36	41	41	71	48	58	5	12	27	3	4	7
ENSG00000102575	ACP5	2	1	2	2	6	0	3	1	1	1	0	3
ENSG00000162836	ACP6	17	17	14	17	12	13	14	6	14	7	8	4
ENSG00000155893	ACPL2	9	6	8	6	8	11	8	3	6	1	0	3
ENSG00000014257	ACPP	0	0	0	0	0	0	2	1	0	2	1	3
ENSG00000142513	ACPT	1	0	1	1	1	1	8	5	4	0	2	2
ENSG00000111644	ACRBP	0	0	0	0	0	0	1	0	0	0	0	0
ENSG00000147174	ACRC	3	0	3	7	9	2	4	7	1	0	0	0
ENSG00000134940	ACRV1	3	1	5	5	3	5	5	5	2	1	3	4
ENSG00000103740	ACSBG1	1523	1234	1395	1533	1806	1613	1209	1166	1441	763	865	879
ENSG00000130377	ACSBG2	1	1	1	1	1	2	3	2	5	2	3	1
ENSG00000167107	ACSF2	4	1	1	6	3	2	22	22	35	11	12	13
ENSG00000176715	ACSF3	15	13	13	27	13	16	33	32	36	20	14	23
ENSG00000151726	ACSL1	18	8	28	40	29	37	58	46	39	15	15	16
ENSG00000123983	ACSL3	134	89	187	132	110	110	92	81	73	34	43	39
ENSG00000068366	ACSL4	84	50	105	244	182	175	82	78	97	26	36	21
ENSG00000197142	ACSL5	3	1	0	81	43	49	2	2	0	1	1	0
ENSG00000164398	ACSL6	0	0	1	2	1	3	0	0	1	0	0	0
ENSG00000005187	ACSM3	96	44	98	18	67	38	49	50	104	34	39	39
ENSG00000154930	ACSS1	2	7	6	6	4	2	9	2	1	0	3	0
ENSG00000131069	ACSS2	25	26	30	24	29	22	15	18	20	4	5	9
ENSG00000143632	ACTA1	0	0	0	0	0	0	0	0	1	0	0	1
ENSG00000107796	ACTA2	15	14	14	10	13	14	4	3	1	1	0	0
ENSG00000180139	ACTA2-AS1	55	71	75	102	117	110	4	2	3	1	1	1
ENSG00000075624	ACTB	576	475	659	2152	1510	1388	3034	3033	4310	1736	1497	1887
ENSG00000188460	ACTBP11	0	0	0	0	0	0	2	0	0	0	0	1
ENSG00000213763	ACTBP2	0	0	0	0	0	0	0	0	0	1	0	0
ENSG00000185607	ACTBP7	0	0	0	0	1	0	0	0	0	0	0	0
ENSG00000266920	ACTBP9	0	0	0	0	0	0	1	1	0	0	0	0
ENSG00000184009	ACTG1	1434	1320	2003	2554	2010	1844	3751	3544	4242	2765	2522	2840
ENSG00000178631	ACTG1P1	0	2	0	0	0	0	1	0	1	0	0	0
ENSG00000231340	ACTG1P10	29	24	26	10	5	12	12	11	7	9	9	9
ENSG00000215388	ACTG1P3	0	0	0	0	0	0	0	0	0	0	0	1
ENSG00000229349	ACTG1P9	0	0	0	0	0	0	0	0	1	0	0	0
ENSG00000182584	ACTL10	25	20	17	27	16	23	46	23	15	18	28	23
ENSG00000136518	ACTL6A	106	78	98	94	51	50	220	214	267	95	102	144
ENSG00000187003	ACTL7A	0	0	2	0	1	0	5	2	2	1	3	0
ENSG00000117148	ACTL8	2	2	3	1	2	0	0	0	0	0	0	0
ENSG00000072110	ACTN1	124	115	126	297	210	184	385	297	416	218	190	208
ENSG00000259062	ACTN1-AS1	0	0	0	0	0	0	1	0	0	0	1	0
ENSG00000130402	ACTN4	205	200	269	620	427	426	378	342	492	216	216	215
ENSG00000213493	ACTN4P1	0	0	0	0	0	0	1	0	0	0	0	0
ENSG00000214141	ACTN4P2	0	0	0	0	0	0	2	0	0	0	0	0
ENSG00000131966	ACTR10	27	22	78	55	32	38	93	66	71	31	37	22
ENSG00000138107	ACTR1A	44	48	58	123	63	74	66	79	93	35	49	31
ENSG00000115073	ACTR1B	42	28	32	51	32	36	35	34	35	12	13	12
ENSG00000138071	ACTR2	148	90	179	244	183	137	271	290	398	115	113	158
ENSG00000115091	ACTR3	231	161	245	424	310	302	366	389	428	129	164	165
ENSG00000133627	ACTR3B	7	3	6	5	6	9	25	9	23	6	5	4
ENSG00000249283	ACTR3BP4	0	0	1	0	0	0	0	0	0	0	0	0
ENSG00000106526	ACTR3C	11	8	10	373	382	314	0	0	0	0	0	0
ENSG00000101442	ACTR5	7	4	2	5	10	5	8	6	9	5	3	4
ENSG00000075089	ACTR6	33	34	48	52	62	43	40	37	32	13	30	34
ENSG00000248915	ACTR6P1	4	0	2	0	0	0	0	0	0	0	0	0
ENSG00000113812	ACTR8	25	25	22	39	22	22	49	39	41	11	23	17
ENSG00000184378	ACTRT3	10	9	8	13	22	16	45	34	58	65	53	62
ENSG00000115170	ACVR1	13	12	11	8	6	2	7	14	7	1	2	2
ENSG00000135503	ACVR1B	14	13	14	15	7	17	10	13	15	11	14	7
ENSG00000123612	ACVR1C	3	0	0	3	5	2	0	0	0	0	0	0
ENSG00000121989	ACVR2A	25	19	22	16	9	13	32	15	15	12	12	15
ENSG00000114739	ACVR2B	13	13	12	10	5	4	10	9	8	6	7	10
ENSG00000229589	ACVR2B-AS1	6	2	6	4	2	3	7	4	6	0	5	1
ENSG00000139567	ACVRL1	0	0	1	0	0	0	1	0	2	0	0	0
ENSG00000243989	ACY1	19	15	16	7	6	5	19	27	14	13	8	12
ENSG00000132744	ACY3	0	0	0	0	0	0	1	0	1	0	0	0
ENSG00000119640	ACYP1	2	9	6	7	10	3	8	12	9	6	5	3
ENSG00000170634	ACYP2	21	26	17	29	26	16	43	47	67	21	17	28
ENSG00000236144	AD000090.2	3	5	1	4	1	4	20	11	6	2	0	4
ENSG00000267135	AD000091.3	619	501	546	410	385	371	452	448	602	499	372	494
ENSG00000240616	AD000092.3	0	0	2	1	0	0	1	0	0	1	0	1
ENSG00000267120	AD000671.6	0	0	0	2	0	0	0	0	0	2	0	0
ENSG00000268947	AD000684.2	7	12	5	5	4	5	16	24	14	21	17	21
ENSG00000270760	AD001527.7	0	0	2	2	0	3	3	2	0	3	0	2
ENSG00000196839	ADA	16	10	27	23	17	13	34	25	27	34	25	26
ENSG00000267511	ADAD1P2	0	0	0	1	0	0	0	0	0	0	0	0
ENSG00000140955	ADAD2	0	0	0	0	0	0	1	0	0	0	0	0
ENSG00000168803	ADAL	12	15	22	5	10	19	12	10	19	3	8	3
ENSG00000137845	ADAM10	86	86	110	83	67	65	404	444	568	129	169	171
ENSG00000073670	ADAM11	2	0	2	1	0	0	8	9	12	7	0	9
ENSG00000148848	ADAM12	1	1	0	0	1	0	3	0	0	2	1	0
ENSG00000143537	ADAM15	59	43	72	90	74	64	81	70	99	35	14	21
ENSG00000151694	ADAM17	163	141	189	165	68	89	219	173	151	75	98	112
ENSG00000135074	ADAM19	0	0	0	5	2	3	0	0	0	0	0	0
ENSG00000229186	ADAM1A	2	4	3	1	0	3	2	0	2	2	2	1
ENSG00000226469	ADAM1B	1	2	1	0	0	2	3	2	2	0	0	1
ENSG00000134007	ADAM20	0	0	0	0	0	0	0	0	1	0	0	0
ENSG00000139985	ADAM21	6	3	1	2	0	6	0	1	0	4	1	3
ENSG00000235812	ADAM21P1	0	1	1	1	0	0	0	0	2	0	0	1
ENSG00000008277	ADAM22	22	11	32	16	15	16	24	13	15	8	9	11
ENSG00000114948	ADAM23	0	2	7	7	4	7	1	2	2	0	0	0
ENSG00000042980	ADAM28	0	0	0	0	1	0	0	0	0	0	0	0
ENSG00000197140	ADAM32	1	0	0	0	1	1	3	0	1	0	0	0
ENSG00000149451	ADAM33	0	0	0	0	0	0	2	0	1	1	0	0
ENSG00000260089	ADAM3B	0	1	0	0	0	0	0	0	0	0	0	0
ENSG00000151651	ADAM8	0	0	1	4	6	4	6	7	3	2	4	4
ENSG00000168615	ADAM9	656	513	852	1086	736	803	310	321	350	119	154	171
ENSG00000154734	ADAMTS1	15	27	24	114	75	89	4	0	0	0	0	0
ENSG00000142303	ADAMTS10	0	0	0	0	0	0	1	2	0	1	0	0
ENSG00000151388	ADAMTS12	0	0	0	0	0	0	15	3	0	2	1	4
ENSG00000160323	ADAMTS13	2	3	1	3	3	1	7	5	1	4	4	8
ENSG00000138316	ADAMTS14	0	0	0	0	0	0	0	0	0	2	0	0
ENSG00000166106	ADAMTS15	1	1	1	0	0	0	0	0	0	0	0	0
ENSG00000145536	ADAMTS16	0	0	0	1	0	0	12	8	8	1	6	5
ENSG00000140470	ADAMTS17	2	2	5	1	0	0	1	2	0	2	0	0
ENSG00000140873	ADAMTS18	0	0	0	2	0	0	1	0	0	0	0	1
ENSG00000145808	ADAMTS19	3	1	3	3	2	4	0	0	0	0	0	0
ENSG00000249421	ADAMTS19-AS1	0	0	0	1	1	0	0	0	0	0	0	0
ENSG00000087116	ADAMTS2	21	29	27	91	59	60	0	0	0	0	0	0
ENSG00000158859	ADAMTS4	0	0	1	0	3	0	15	19	16	14	10	7
ENSG00000154736	ADAMTS5	0	0	0	0	0	0	1	0	0	0	0	0
ENSG00000049192	ADAMTS6	1	0	0	10	2	0	0	0	0	0	0	0
ENSG00000136378	ADAMTS7	0	1	1	0	0	0	4	2	1	1	1	2
ENSG00000134917	ADAMTS8	1	1	7	1	0	0	1	1	1	0	0	0
ENSG00000163638	ADAMTS9	0	1	1	0	0	0	0	0	0	0	0	0
ENSG00000178031	ADAMTSL1	0	0	0	0	0	0	0	1	0	0	0	0
ENSG00000197859	ADAMTSL2	0	0	0	0	0	0	0	1	0	0	0	0
ENSG00000156218	ADAMTSL3	0	0	0	1	0	1	0	0	0	0	0	0
ENSG00000143382	ADAMTSL4	4	10	7	12	3	9	51	17	10	15	14	18
ENSG00000203804	ADAMTSL4-AS1	0	0	0	1	0	0	1	2	0	0	0	0
ENSG00000185761	ADAMTSL5	2	5	4	6	3	4	7	6	9	14	18	13
ENSG00000105963	ADAP1	7	7	4	8	2	2	8	8	4	5	3	8
ENSG00000184060	ADAP2	2	0	0	0	3	1	12	5	20	15	15	15
ENSG00000160710	ADAR	153	144	212	167	94	106	304	334	387	107	104	120
ENSG00000197381	ADARB1	12	8	20	20	13	8	50	32	42	23	19	18
ENSG00000065457	ADAT1	11	6	22	16	8	9	22	20	35	10	5	8
ENSG00000189007	ADAT2	8	13	19	16	12	8	18	16	28	15	17	10
ENSG00000213638	ADAT3	1	0	2	2	0	1	2	2	5	0	0	0
ENSG00000142920	ADC	0	3	2	3	2	1	4	6	3	2	4	1
ENSG00000063761	ADCK1	2	3	4	3	2	6	8	5	6	2	5	7
ENSG00000133597	ADCK2	13	22	30	22	16	17	22	25	30	26	13	16
ENSG00000163050	ADCK3	35	31	39	25	9	10	62	40	59	32	40	49
ENSG00000123815	ADCK4	7	9	7	12	7	7	15	13	13	6	10	1
ENSG00000173137	ADCK5	11	6	8	4	2	4	3	5	4	3	2	7
ENSG00000164742	ADCY1	1	1	0	0	1	0	2	1	1	4	3	2
ENSG00000143199	ADCY10	0	0	0	0	1	0	3	2	1	2	0	0
ENSG00000161912	ADCY10P1	0	0	0	0	0	0	1	1	0	0	0	0
ENSG00000078295	ADCY2	0	0	0	0	0	0	0	1	0	0	0	0
ENSG00000138031	ADCY3	448	486	432	477	440	429	563	584	778	355	338	443
ENSG00000129467	ADCY4	0	2	0	0	0	0	3	0	1	2	3	4
ENSG00000173175	ADCY5	5	0	5	2	4	1	21	14	12	5	11	2
ENSG00000174233	ADCY6	9	12	15	11	5	8	6	8	21	1	1	6
ENSG00000121281	ADCY7	48	71	73	55	46	37	156	192	217	61	77	78
ENSG00000162104	ADCY9	10	7	13	13	12	17	15	10	28	7	2	6
ENSG00000087274	ADD1	71	96	97	154	93	101	96	88	98	56	55	62
ENSG00000075340	ADD2	0	0	0	0	0	0	4	5	10	0	1	0
ENSG00000148700	ADD3	46	38	74	43	36	28	0	3	1	2	5	6
ENSG00000187758	ADH1A	0	0	0	0	0	0	1	0	0	0	0	0
ENSG00000196616	ADH1B	0	1	0	0	0	0	0	0	0	0	0	0
ENSG00000197894	ADH5	121	103	156	202	119	139	160	129	171	59	87	112
ENSG00000172955	ADH6	0	0	0	1	0	0	0	0	0	1	0	1
ENSG00000147576	ADHFE1	3	1	0	2	5	0	1	0	0	0	0	0
ENSG00000182551	ADI1	80	69	95	120	77	81	336	308	409	135	131	180
ENSG00000159346	ADIPOR1	46	26	44	62	45	39	75	64	59	46	40	41
ENSG00000006831	ADIPOR2	53	26	33	79	45	52	58	51	57	21	26	21
ENSG00000148671	ADIRF	8	6	5	6	1	6	177	187	236	111	98	101
ENSG00000272734	ADIRF-AS1	0	0	0	2	1	0	2744	3176	3879	2320	2199	2440
ENSG00000156110	ADK	40	36	60	108	70	76	65	57	66	19	31	41
ENSG00000148926	ADM	9	6	8	28	20	17	25	13	3	1	1	1
ENSG00000128165	ADM2	2	4	6	7	0	2	3	0	1	0	1	0
ENSG00000224420	ADM5	3	4	6	1	1	2	6	4	1	5	1	2
ENSG00000101126	ADNP	27	34	52	45	36	33	58	61	78	22	36	37
ENSG00000101544	ADNP2	45	32	39	50	33	39	78	62	70	46	57	67
ENSG00000181915	ADO	33	16	35	49	47	41	45	34	60	33	36	35
ENSG00000163485	ADORA1	0	0	0	0	0	0	1	7	9	2	4	6
ENSG00000128271	ADORA2A	0	0	0	1	0	0	32	5	18	17	1	0
ENSG00000178803	ADORA2A-AS1	0	2	1	4	0	1	46	21	33	9	16	24
ENSG00000170425	ADORA2B	109	138	143	101	69	73	89	84	87	45	50	56
ENSG00000159322	ADPGK	37	20	34	15	11	16	29	35	29	11	12	10
ENSG00000260898	ADPGK-AS1	134	125	102	52	57	57	51	80	85	50	51	45
ENSG00000144843	ADPRH	2	3	6	13	9	8	0	0	1	0	0	0
ENSG00000153531	ADPRHL1	2	2	3	5	1	4	6	7	6	2	1	2
ENSG00000116863	ADPRHL2	15	14	13	29	20	15	13	14	23	11	10	4
ENSG00000170222	ADPRM	8	4	12	6	4	3	23	22	21	3	5	2
ENSG00000171873	ADRA1D	0	0	0	0	0	0	5	2	3	1	0	0
ENSG00000184160	ADRA2C	1	0	2	2	0	1	21	14	25	13	5	8
ENSG00000043591	ADRB1	0	0	0	2	3	2	0	2	1	1	0	0
ENSG00000169252	ADRB2	1	1	3	11	4	9	0	0	0	0	0	0
ENSG00000188778	ADRB3	1	0	0	0	0	0	0	0	0	0	0	0
ENSG00000173020	ADRBK1	12	8	20	44	24	30	33	27	32	24	20	25
ENSG00000100077	ADRBK2	14	9	12	9	6	2	21	12	13	5	6	16
ENSG00000130706	ADRM1	52	46	49	109	97	96	135	117	123	88	58	62
ENSG00000239900	ADSL	98	69	87	101	89	82	63	60	106	42	37	45
ENSG00000035687	ADSS	49	43	74	101	66	71	158	140	177	69	65	95
ENSG00000185100	ADSSL1	0	0	2	1	2	0	5	3	9	1	3	1
ENSG00000111863	ADTRP	10	6	14	12	6	10	60	33	39	12	14	18
ENSG00000257096	AE000658.22	0	0	0	0	0	0	6	8	21	12	9	7
ENSG00000251002	AE000661.37	0	0	0	1	0	0	0	0	0	0	0	0
ENSG00000259003	AE000662.92	0	0	0	0	0	0	1	1	0	1	1	0
ENSG00000106624	AEBP1	3	0	0	1	1	4	6	6	5	4	4	5
ENSG00000139154	AEBP2	18	24	34	22	21	19	35	41	33	13	11	18
ENSG00000181026	AEN	37	57	62	77	91	83	70	53	42	29	24	33
ENSG00000104964	AES	43	40	49	79	66	53	141	107	140	69	60	82
ENSG00000263335	AF001548.5	0	0	1	0	0	0	1	0	0	0	0	0
ENSG00000238039	AF011889.2	47	56	61	112	91	106	26	25	33	28	22	26
ENSG00000267113	AF038458.4	0	0	0	0	0	0	1	0	0	0	0	0
ENSG00000224649	AF124730.4	0	0	0	1	0	0	0	0	0	1	0	0
ENSG00000229047	AF127577.10	119	99	167	86	102	70	2	8	3	16	31	26
ENSG00000231201	AF127577.11	0	0	1	0	0	0	0	0	0	0	1	0
ENSG00000235609	AF127936.7	1	2	1	5	9	3	49	61	77	21	22	26
ENSG00000231125	AF129075.5	2	0	2	0	0	0	1	1	0	1	1	1
ENSG00000272991	AF129408.17	4	2	3	2	4	6	5	9	10	1	4	0
ENSG00000231965	AF131215.1	0	1	4	1	3	0	0	0	0	0	0	0
ENSG00000255310	AF131215.2	4	2	3	3	4	5	0	0	0	0	0	0
ENSG00000254936	AF131215.3	1	0	0	0	0	0	0	0	0	0	0	0
ENSG00000254839	AF131215.6	0	0	0	0	0	0	0	0	0	0	1	0
ENSG00000270076	AF131215.8	1	0	0	0	0	0	0	0	0	0	0	0
ENSG00000269918	AF131215.9	0	1	2	3	0	4	0	0	0	0	0	0
ENSG00000255020	AF131216.5	0	0	0	0	0	0	0	0	1	0	0	0
ENSG00000246477	AF131216.6	72	65	82	83	68	85	90	80	89	114	114	97
ENSG00000245685	AF146191.4	0	0	1	0	0	0	0	0	0	0	0	0
ENSG00000255085	AF186192.5	0	0	0	0	0	0	3	0	0	0	0	0
ENSG00000263612	AF186192.6	0	0	0	1	4	0	1	3	1	1	3	2
ENSG00000232828	AF196970.3	139	118	112	181	179	145	214	259	463	344	300	324
ENSG00000224292	AF196972.9	0	0	0	1	0	0	0	1	0	0	0	0
ENSG00000184596	AF207550.1	4	6	5	3	9	3	21	6	4	7	9	14
ENSG00000260651	AF213884.2	0	0	2	3	2	4	7	11	12	9	14	9
ENSG00000241981	AF224669.3	0	0	1	1	0	0	0	0	0	1	1	0
ENSG00000223697	AF230666.2	161	124	131	144	113	108	112	123	121	95	101	103
ENSG00000196526	AFAP1	493	443	474	510	411	377	106	94	144	38	27	49
ENSG00000272620	AFAP1-AS1	582	570	523	705	669	631	99	73	103	56	40	44
ENSG00000157510	AFAP1L1	0	1	0	2	0	1	5	2	0	9	2	6
ENSG00000169129	AFAP1L2	1	3	5	1	0	1	0	1	0	0	0	0
ENSG00000172493	AFF1	18	7	12	44	26	23	22	17	23	5	6	10
ENSG00000144218	AFF3	0	0	0	0	0	0	2	1	0	0	0	0
ENSG00000072364	AFF4	95	95	134	181	120	136	307	279	283	102	134	157
ENSG00000223959	AFG3L1P	13	20	13	23	15	10	28	21	20	11	10	7
ENSG00000141385	AFG3L2	464	383	464	499	398	408	406	358	374	163	157	173
ENSG00000253606	AFG3L2P1	0	0	0	0	0	0	1	0	0	0	0	0
ENSG00000183077	AFMID	14	4	7	12	16	5	14	7	22	7	7	7
ENSG00000119844	AFTPH	67	54	70	58	30	38	86	66	86	20	57	42
ENSG00000038002	AGA	7	5	15	1	5	3	13	9	8	5	6	5
ENSG00000157985	AGAP1	27	39	33	64	44	50	35	21	25	14	19	21
ENSG00000204172	AGAP10	0	1	3	6	1	1	2	0	6	1	0	1
ENSG00000151303	AGAP11	0	0	0	0	0	0	1	0	1	0	0	3
ENSG00000135439	AGAP2	133	115	150	165	144	149	59	57	66	65	55	72
ENSG00000255737	AGAP2-AS1	7	11	9	15	7	11	3	5	7	6	1	4
ENSG00000133612	AGAP3	21	28	25	89	51	47	53	45	75	50	32	58
ENSG00000188234	AGAP4	1	0	6	0	0	2	12	0	3	0	0	4
ENSG00000172650	AGAP5	3	3	1	0	0	0	0	3	1	0	0	0
ENSG00000204149	AGAP6	5	3	4	6	8	2	8	5	9	2	5	3
ENSG00000204169	AGAP7	0	0	0	0	0	0	0	4	0	0	0	0
ENSG00000174194	AGAP8	7	8	0	1	5	5	0	7	5	2	3	4
ENSG00000198035	AGAP9	2	1	2	0	2	0	0	4	0	0	0	0
ENSG00000165923	AGBL2	0	0	0	0	1	0	0	0	0	0	0	0
ENSG00000146856	AGBL3	3	0	1	4	0	0	1	3	0	0	0	0
ENSG00000186094	AGBL4	0	1	0	0	0	0	0	0	0	0	0	0
ENSG00000084693	AGBL5	181	167	161	191	182	203	136	137	149	77	76	117
ENSG00000231636	AGBL5-AS1	0	0	0	1	1	1	0	0	0	0	0	0
ENSG00000229122	AGBL5-IT1	0	0	0	1	0	1	0	4	0	0	0	0
ENSG00000204305	AGER	15	11	14	18	12	22	35	18	19	15	11	23
ENSG00000173744	AGFG1	71	45	84	87	59	44	37	36	35	18	15	23
ENSG00000106351	AGFG2	5	2	13	6	8	4	10	16	17	5	2	1
ENSG00000164252	AGGF1	55	49	93	89	70	70	190	192	258	70	113	115
ENSG00000214273	AGGF1P1	4	1	7	1	1	0	4	2	3	1	1	0
ENSG00000233435	AGGF1P2	3	2	1	0	1	1	3	3	2	1	0	0
ENSG00000241532	AGGF1P3	0	0	0	0	0	0	0	1	0	0	0	0
ENSG00000006530	AGK	30	27	39	41	32	26	45	48	51	29	23	24
ENSG00000162688	AGL	22	14	33	37	28	35	26	23	32	10	17	12
ENSG00000116771	AGMAT	9	5	6	16	9	5	3	1	4	2	2	2
ENSG00000092847	AGO1	18	18	23	23	17	22	39	28	40	20	22	26
ENSG00000123908	AGO2	19	20	42	39	29	22	49	35	36	33	30	38
ENSG00000126070	AGO3	17	17	29	45	20	28	50	47	51	13	24	20
ENSG00000134698	AGO4	9	11	15	7	5	5	19	24	19	9	12	10
ENSG00000204310	AGPAT1	13	17	19	13	9	9	39	31	53	15	7	23
ENSG00000169692	AGPAT2	11	15	21	22	16	20	31	33	43	28	17	20
ENSG00000160216	AGPAT3	26	33	47	77	68	56	55	33	62	30	23	32
ENSG00000026652	AGPAT4	3	6	9	5	4	8	12	9	7	5	6	10
ENSG00000155189	AGPAT5	49	47	66	78	62	67	113	88	104	45	64	63
ENSG00000158669	AGPAT6	40	35	45	84	56	69	74	56	67	20	30	21
ENSG00000138678	AGPAT9	4	6	3	17	11	24	13	3	4	3	0	0
ENSG00000018510	AGPS	100	91	138	180	125	135	92	117	141	51	70	72
ENSG00000106541	AGR2	80	59	140	1	0	0	3	0	0	0	0	0
ENSG00000188157	AGRN	217	275	288	456	322	306	24	31	47	18	14	23
ENSG00000159723	AGRP	2	1	0	1	1	0	0	0	0	1	0	0
ENSG00000135744	AGT	0	0	0	0	0	0	0	0	0	0	0	1
ENSG00000135049	AGTPBP1	86	76	113	87	63	68	76	82	68	22	30	35
ENSG00000177674	AGTRAP	10	3	8	13	5	7	22	18	35	9	11	10
ENSG00000172482	AGXT	0	0	0	0	0	0	0	0	1	0	0	0
ENSG00000113492	AGXT2	0	0	0	0	0	0	1	0	1	0	0	0
ENSG00000153207	AHCTF1	115	123	181	187	133	123	471	434	466	207	257	282
ENSG00000226121	AHCTF1P1	1	1	2	2	0	0	15	5	13	4	3	9
ENSG00000101444	AHCY	273	224	316	212	155	177	369	345	379	232	218	295
ENSG00000168710	AHCYL1	92	90	145	142	113	95	154	123	157	74	87	79
ENSG00000158467	AHCYL2	7	3	12	13	16	18	16	15	8	10	6	9
ENSG00000238181	AHCYP2	1	1	1	1	0	0	1	0	0	0	0	0
ENSG00000213107	AHCYP5	0	0	0	0	0	0	1	0	0	0	0	0
ENSG00000126705	AHDC1	66	88	80	75	45	69	6	10	8	2	0	0
ENSG00000135541	AHI1	36	43	72	63	44	45	135	112	124	40	54	66
ENSG00000124942	AHNAK	444	385	824	579	417	413	550	640	851	33	35	42
ENSG00000185567	AHNAK2	208	252	383	446	296	246	277	273	525	31	44	36
ENSG00000106546	AHR	17	17	24	38	25	26	15	14	21	11	17	18
ENSG00000063438	AHRR	0	0	0	1	0	0	17	15	16	12	7	10
ENSG00000100591	AHSA1	71	60	79	207	131	156	451	379	360	152	187	170
ENSG00000173209	AHSA2	579	631	660	592	516	458	606	577	797	572	682	743
ENSG00000186063	AIDA	148	144	160	217	171	154	633	564	643	212	230	258
ENSG00000204472	AIF1	0	0	0	0	0	0	0	0	0	0	0	2
ENSG00000126878	AIF1L	22	21	25	21	17	21	8	6	6	10	8	5
ENSG00000156709	AIFM1	50	50	60	75	41	35	106	109	94	73	56	61
ENSG00000042286	AIFM2	12	20	20	20	22	20	24	17	11	12	11	15
ENSG00000183773	AIFM3	0	0	1	1	4	4	4	2	8	8	5	2
ENSG00000146416	AIG1	43	37	55	53	43	38	13	16	24	4	7	9
ENSG00000112297	AIM1	187	192	286	3	4	4	1	1	3	2	2	1
ENSG00000164022	AIMP1	126	106	150	138	116	123	178	161	171	118	95	122
ENSG00000227177	AIMP1P2	0	0	0	0	0	0	1	1	0	0	1	1
ENSG00000106305	AIMP2	65	56	66	91	65	58	80	70	80	42	47	54
ENSG00000110711	AIP	30	31	47	24	21	21	22	19	22	13	6	12
ENSG00000160224	AIRE	1	0	0	1	0	0	3	1	1	1	0	1
ENSG00000268257	AIRN	8	1	5	4	2	3	10	6	0	3	9	9
ENSG00000262668	AJ003147.9	0	0	1	0	0	0	3	0	0	1	0	0
ENSG00000270726	AJ271736.10	0	0	0	0	0	4	0	0	0	0	0	0
ENSG00000129474	AJUBA	84	65	91	100	56	70	25	20	27	3	6	10
ENSG00000106992	AK1	18	10	14	30	29	26	26	21	21	22	14	14
ENSG00000004455	AK2	230	167	276	286	209	181	248	210	244	116	127	137
ENSG00000147853	AK3	79	54	104	103	81	64	52	40	59	16	31	27
ENSG00000250115	AK3P2	0	0	0	0	0	0	0	0	0	0	1	0
ENSG00000228816	AK3P5	4	8	5	14	11	9	9	5	3	8	5	4
ENSG00000162433	AK4	42	33	49	61	51	44	60	50	43	3	8	8
ENSG00000263535	AK4P1	0	1	6	0	3	0	0	0	4	0	1	0
ENSG00000249410	AK4P2	0	0	0	1	0	0	0	0	0	0	0	0
ENSG00000233381	AK4P3	2	0	0	1	0	0	2	11	6	2	0	0
ENSG00000223621	AK4P4	0	0	0	0	0	0	1	0	0	1	0	0
ENSG00000154027	AK5	5	1	2	0	2	4	125	131	181	26	22	27
ENSG00000140057	AK7	1	0	1	0	0	2	4	0	3	0	0	0
ENSG00000165695	AK8	4	2	3	1	2	0	1	3	6	3	1	1
ENSG00000155085	AK9	2	1	4	4	2	3	11	5	3	6	2	1
ENSG00000121057	AKAP1	30	32	54	38	50	30	40	51	57	31	32	34
ENSG00000108599	AKAP10	27	25	29	31	31	34	59	48	51	25	33	31
ENSG00000023516	AKAP11	47	31	50	66	41	37	38	40	51	16	29	38
ENSG00000131016	AKAP12	158	150	249	383	229	201	19	10	22	10	13	12
ENSG00000170776	AKAP13	64	71	102	135	65	97	39	27	35	29	26	38
ENSG00000214992	AKAP16BP	4	0	0	1	1	2	13	3	0	4	1	7
ENSG00000197976	AKAP17A	78	74	54	92	34	38	691	446	254	252	229	238
ENSG00000241978	AKAP2	254	214	364	960	664	654	1	2	0	0	1	0
ENSG00000111254	AKAP3	0	0	1	1	1	1	6	3	0	1	0	1
ENSG00000179841	AKAP5	5	6	7	5	7	7	6	5	3	4	4	7
ENSG00000151320	AKAP6	2	1	2	3	3	3	0	0	0	0	0	0
ENSG00000118507	AKAP7	3	6	4	4	3	1	7	6	8	2	4	7
ENSG00000105127	AKAP8	34	29	40	54	47	37	65	43	69	34	35	30
ENSG00000011243	AKAP8L	33	39	46	84	47	37	93	102	106	95	55	73
ENSG00000127914	AKAP9	143	122	211	129	91	74	184	162	203	97	110	133
ENSG00000166452	AKIP1	27	22	28	22	16	15	19	21	25	7	7	12
ENSG00000174574	AKIRIN1	96	61	89	181	124	113	176	133	157	52	53	73
ENSG00000135334	AKIRIN2	9	10	9	16	9	9	30	35	26	8	9	14
ENSG00000106948	AKNA	6	10	11	6	1	1	16	12	4	8	2	3
ENSG00000162641	AKNAD1	0	0	0	0	1	0	5	7	6	5	1	9
ENSG00000117448	AKR1A1	45	49	74	56	49	49	30	25	32	19	28	35
ENSG00000085662	AKR1B1	31	18	32	48	22	26	3141	3011	3688	48	39	48
ENSG00000198074	AKR1B10	0	0	0	0	0	0	1	0	1	0	0	0
ENSG00000237876	AKR1B1P4	0	0	0	0	0	0	0	0	0	1	0	0
ENSG00000187134	AKR1C1	0	0	0	1	0	1	679	535	637	257	297	266
ENSG00000151632	AKR1C2	0	0	0	0	0	0	66	29	36	12	28	21
ENSG00000196139	AKR1C3	0	0	0	0	0	0	0	3	3	1	2	4
ENSG00000151631	AKR1C6P	0	0	0	0	0	0	1	0	2	0	0	0
ENSG00000196326	AKR1CL1	0	0	0	0	0	0	1	0	0	0	0	0
ENSG00000227776	AKR1D1P1	0	0	0	0	0	0	1	1	0	0	0	0
ENSG00000165568	AKR1E2	0	0	0	0	0	0	9	6	6	7	5	3
ENSG00000053371	AKR7A2	10	14	20	37	21	28	47	29	34	28	16	25
ENSG00000229020	AKR7A2P1	14	12	10	12	17	13	33	14	6	21	25	22
ENSG00000162482	AKR7A3	0	2	0	1	1	1	0	1	1	0	1	2
ENSG00000211454	AKR7L	4	3	0	0	0	0	16	5	3	4	2	5
ENSG00000142208	AKT1	46	43	84	99	107	93	135	123	173	76	66	80
ENSG00000204673	AKT1S1	23	18	15	30	31	26	66	56	58	26	21	34
ENSG00000105221	AKT2	22	24	29	47	31	30	54	44	66	45	24	36
ENSG00000117020	AKT3	24	31	40	25	22	19	30	24	34	6	12	10
ENSG00000166971	AKTIP	116	78	136	39	37	36	223	209	272	30	73	47
ENSG00000223474	AL020996.1	7	7	13	23	23	22	22	30	40	15	19	19
ENSG00000213062	AL021068.1	1	0	0	1	2	1	3	1	2	0	0	0
ENSG00000203583	AL021707.1	0	1	0	0	0	0	0	0	0	0	0	0
ENSG00000268427	AL022328.1	40	36	50	41	26	33	17	18	14	11	14	15
ENSG00000228201	AL022341.3	0	0	0	2	0	1	0	0	0	0	0	1
ENSG00000216901	AL022393.7	1	0	0	0	0	0	0	0	0	0	0	0
ENSG00000230319	AL022476.2	34	47	37	25	24	26	36	42	70	32	31	25
ENSG00000269549	AL031663.2	0	0	0	0	0	0	1	0	0	0	0	0
ENSG00000267882	AL031666.2	11	13	14	10	14	7	18	6	6	10	10	11
ENSG00000268302	AL035252.1	337	298	287	592	488	516	261	228	232	200	195	207
ENSG00000236532	AL035610.2	0	0	0	0	0	0	0	0	2	0	0	0
ENSG00000256323	AL049542.1	0	0	0	0	0	1	0	0	0	0	1	1
ENSG00000268818	AL049747.1	0	0	0	1	0	0	0	0	0	0	0	1
ENSG00000268702	AL049829.1	149	143	145	182	179	155	246	234	271	295	274	272
ENSG00000224997	AL049840.1	31	44	23	43	37	38	36	23	26	21	21	37
ENSG00000244676	AL109761.5	2	1	3	1	2	1	0	0	0	0	0	0
ENSG00000235785	AL109767.1	0	0	2	0	0	0	0	0	0	0	0	0
ENSG00000268552	AL109927.1	67	55	50	49	39	37	51	49	84	35	20	35
ENSG00000267848	AL118506.1	4	1	0	1	0	1	4	3	4	3	5	2
ENSG00000268628	AL121761.2	2	1	1	0	1	0	3	3	5	1	4	3
ENSG00000234188	AL121963.1	0	0	0	1	0	0	0	0	0	0	0	0
ENSG00000207765	AL132780.1	0	0	0	0	0	0	0	0	0	0	0	1
ENSG00000183504	AL132868.1	3	0	1	0	1	1	3	0	1	0	1	0
ENSG00000268466	AL132989.1	19	18	19	17	11	7	10	9	8	9	5	9
ENSG00000272754	AL133245.2	0	0	0	0	0	0	1	0	0	0	0	0
ENSG00000267849	AL133262.1	1	0	0	1	0	0	1	0	0	0	0	1
ENSG00000268657	AL133373.1	0	0	0	0	1	0	11	7	3	0	1	1
ENSG00000197146	AL133458.1	0	1	0	1	0	0	0	0	0	0	0	0
ENSG00000212673	AL136115.1	18	15	9	29	16	10	43	25	25	43	43	43
ENSG00000215462	AL136218.1	0	0	0	0	0	0	3	0	0	0	0	0
ENSG00000269279	AL136376.1	152	138	135	124	95	107	70	72	75	56	44	64
ENSG00000260669	AL136419.6	9	3	5	7	4	5	30	28	33	23	19	15
ENSG00000203630	AL136531.1	5	7	8	3	5	1	8	9	2	6	7	3
ENSG00000203602	AL137059.1	3	4	6	7	4	4	2	2	3	9	10	11
ENSG00000269624	AL138847.1	5	2	4	3	2	1	3	2	2	1	4	7
ENSG00000223683	AL138935.1	1	0	1	0	0	0	1	0	0	0	0	2
ENSG00000253459	AL139099.1	78	65	58	82	88	69	65	82	87	69	49	72
ENSG00000255831	AL139385.1	0	3	8	0	2	5	7	0	0	1	1	6
ENSG00000256545	AL139819.1	2	0	12	20	17	21	0	23	15	4	19	17
ENSG00000259052	AL157871.2	0	0	0	0	0	0	1	0	2	0	0	0
ENSG00000269223	AL158091.1	0	0	0	0	0	0	1	0	0	0	0	0
ENSG00000267987	AL161784.1	0	0	0	4	2	4	0	1	0	1	0	0
ENSG00000212670	AL161915.1	0	2	0	1	0	0	0	0	0	0	0	0
ENSG00000234648	AL162151.3	0	9	8	0	0	0	0	0	9	3	6	0
ENSG00000214645	AL162389.1	0	0	0	1	0	0	1	0	0	1	0	0
ENSG00000255813	AL162497.1	0	0	1	1	0	0	0	0	0	0	0	1
ENSG00000237356	AL163953.3	0	0	0	1	0	0	0	0	0	0	0	0
ENSG00000269804	AL353354.2	1056	1055	1003	1049	1043	1012	875	832	1074	566	505	571
ENSG00000269879	AL353583.1	1	0	0	1	1	1	1	0	0	0	0	0
ENSG00000228537	AL353608.1	2	1	0	1	1	1	0	0	0	1	3	1
ENSG00000263875	AL353629.1	0	2	2	3	0	2	3	1	2	2	1	1
ENSG00000203542	AL353671.1	0	0	0	0	0	0	0	0	0	1	0	0
ENSG00000203543	AL353671.2	0	0	0	0	0	0	0	1	0	0	0	0
ENSG00000203659	AL353671.3	37	14	23	47	91	62	9	19	29	17	25	16
ENSG00000237611	AL353898.3	4	1	2	0	0	1	2	4	2	1	0	0
ENSG00000268578	AL354718.1	0	0	0	1	3	0	0	0	0	0	0	1
ENSG00000269591	AL354808.2	3	7	3	1	0	5	4	3	1	2	4	2
ENSG00000227164	AL354993.1	0	0	0	0	0	0	0	0	0	2	0	0
ENSG00000268674	AL355149.2	0	0	0	0	0	0	0	1	0	0	0	0
ENSG00000268421	AL355531.2	0	0	0	0	0	0	1	1	0	0	0	0
ENSG00000225996	AL356356.1	3	3	4	6	4	4	37	12	6	5	11	10
ENSG00000234603	AL356740.1	1	0	0	4	0	0	0	0	0	0	0	2
ENSG00000266032	AL357515.1	0	0	0	1	0	0	0	1	0	0	0	0
ENSG00000248835	AL357673.1	1	0	6	0	1	0	1	3	2	0	0	0
ENSG00000269295	AL358113.1	279	353	317	921	832	838	3	1	2	3	4	1
ENSG00000176868	AL358781.1	113	152	141	150	128	134	245	274	306	218	175	210
ENSG00000203815	AL358813.2	0	0	0	1	0	0	0	0	0	0	0	0
ENSG00000268211	AL359091.2	0	0	0	0	0	0	0	0	1	0	0	1
ENSG00000205850	AL359736.1	0	0	0	0	0	0	0	1	0	0	0	0
ENSG00000196979	AL360004.1	0	2	0	0	0	1	0	2	0	0	0	0
ENSG00000228217	AL390877.1	0	0	1	0	0	0	0	0	0	0	0	0
ENSG00000212928	AL391152.1	278	235	292	218	260	226	249	251	340	199	253	271
ENSG00000204049	AL391421.1	7	4	12	3	9	2	3	6	2	4	1	5
ENSG00000268059	AL441883.1	1231	1111	1171	1208	1109	1081	1047	1044	1228	1057	1030	1108
ENSG00000176134	AL445665.1	0	0	4	0	4	2	0	1	0	0	0	0
ENSG00000225084	AL450226.2	0	2	0	0	2	1	0	0	1	0	2	0
ENSG00000234614	AL450992.2	0	0	0	1	0	0	0	0	0	0	0	0
ENSG00000203614	AL512652.1	0	0	0	0	0	0	4	0	0	1	0	0
ENSG00000256142	AL513327.1	0	0	0	0	1	0	0	0	1	0	0	0
ENSG00000178642	AL513477.1	45	44	40	31	40	31	45	44	48	33	34	39
ENSG00000187461	AL583828.1	0	0	0	0	0	0	0	1	0	0	0	0
ENSG00000269753	AL589739.1	0	0	0	0	0	0	0	0	1	0	0	0
ENSG00000225210	AL589743.1	0	0	0	1	0	0	63	35	35	7	16	27
ENSG00000255824	AL590369.1	0	0	0	0	0	0	3	0	7	8	0	0
ENSG00000268172	AL590452.1	0	0	0	1	1	0	2	1	0	0	0	0
ENSG00000268387	AL590714.1	0	0	0	1	0	0	0	0	0	0	0	0
ENSG00000229601	AL590762.10	0	0	1	0	0	0	0	1	0	1	0	1
ENSG00000213018	AL590762.11	0	0	0	1	0	2	1	2	2	1	4	2
ENSG00000224208	AL590762.6	0	0	0	1	1	0	0	0	0	0	0	0
ENSG00000215120	AL590763.5	0	0	1	0	0	0	0	1	1	1	1	1
ENSG00000203301	AL590822.1	10	7	7	5	6	4	9	8	6	4	3	2
ENSG00000269554	AL590822.2	50	65	46	205	207	198	69	55	79	73	92	123
ENSG00000213121	AL590867.1	1	0	0	0	0	0	0	1	0	0	0	1
ENSG00000269337	AL591479.1	171	130	162	189	174	121	104	90	84	30	31	45
ENSG00000203284	AL591516.1	0	0	0	0	0	0	0	0	0	0	0	1
ENSG00000213167	AL591516.4	1	0	0	0	0	0	0	1	0	0	0	0
ENSG00000214985	AL591516.5	0	0	0	0	0	0	0	0	1	0	0	1
ENSG00000231360	AL592284.1	35	30	34	33	27	30	0	0	0	0	0	0
ENSG00000264248	AL603831.1	0	0	0	0	0	0	3	2	1	0	2	2
ENSG00000215033	AL603965.1	0	0	0	0	0	0	0	0	0	1	2	0
ENSG00000267884	AL626787.1	0	0	0	0	0	1	1	0	0	1	0	0
ENSG00000269832	AL627171.2	1	3	2	2	3	2	8	2	4	6	6	7
ENSG00000237683	AL627309.1	0	0	0	1	0	0	0	0	0	0	0	0
ENSG00000268179	AL645608.1	0	0	1	1	0	0	2	1	1	0	0	1
ENSG00000215014	AL645728.1	0	0	0	1	0	0	1	2	4	1	1	4
ENSG00000215791	AL645728.2	3	3	1	0	0	6	0	5	1	0	0	0
ENSG00000233084	AL672183.2	0	0	0	1	0	0	1	4	0	0	0	0
ENSG00000227237	AL672294.1	0	0	0	0	0	0	0	0	0	0	1	0
ENSG00000184961	AL772307.1	0	1	1	0	0	0	1	0	0	0	0	1
ENSG00000236519	AL773604.8	0	5	2	3	1	2	4	4	2	1	0	4
ENSG00000268996	AL807752.1	0	0	0	0	1	0	1	2	1	0	2	3
ENSG00000236029	AL953854.2	1	1	0	0	0	0	0	1	1	1	0	0
ENSG00000148218	ALAD	8	2	10	16	7	7	5	4	10	1	2	5
ENSG00000023330	ALAS1	30	29	47	51	45	44	71	49	62	28	33	38
ENSG00000158578	ALAS2	1	0	0	0	0	0	1	0	1	2	0	1
ENSG00000170017	ALCAM	287	238	408	210	167	195	11	8	2	0	2	3
ENSG00000161618	ALDH16A1	23	40	34	17	24	20	32	27	35	25	16	23
ENSG00000059573	ALDH18A1	113	96	119	121	87	109	140	127	144	71	95	80
ENSG00000165092	ALDH1A1	0	0	0	2	0	0	1926	1674	2054	1126	1357	1397
ENSG00000128918	ALDH1A2	0	0	0	0	0	0	10	2	6	6	4	4
ENSG00000184254	ALDH1A3	323	327	416	89	73	76	473	440	539	160	193	179
ENSG00000137124	ALDH1B1	32	22	35	77	62	56	39	41	61	17	23	27
ENSG00000144908	ALDH1L1	15	6	11	1	1	0	0	0	0	2	0	0
ENSG00000246022	ALDH1L1-AS2	0	0	0	2	0	2	1	0	0	0	0	0
ENSG00000136010	ALDH1L2	2	4	7	3	1	1	5	5	3	1	4	1
ENSG00000111275	ALDH2	45	27	44	95	72	47	0	0	0	0	0	0
ENSG00000108602	ALDH3A1	2	2	0	0	2	0	2	0	0	0	1	0
ENSG00000072210	ALDH3A2	28	38	59	82	66	68	273	267	291	62	82	82
ENSG00000006534	ALDH3B1	23	19	25	20	19	15	6	9	10	3	2	5
ENSG00000159423	ALDH4A1	27	23	37	73	36	62	31	37	58	20	23	26
ENSG00000112294	ALDH5A1	14	18	22	21	20	17	35	23	28	6	8	13
ENSG00000119711	ALDH6A1	49	76	79	22	21	20	53	50	45	24	27	37
ENSG00000164904	ALDH7A1	31	23	42	23	15	8	202	190	221	62	58	76
ENSG00000251400	ALDH7A1P1	0	0	0	0	0	0	0	1	1	0	0	0
ENSG00000118514	ALDH8A1	0	0	0	0	0	0	1	1	1	0	1	3
ENSG00000143149	ALDH9A1	117	77	136	138	90	104	153	130	182	87	95	101
ENSG00000149925	ALDOA	226	176	236	370	293	248	975	857	1124	457	365	410
ENSG00000214297	ALDOAP2	1	0	0	0	0	0	0	0	0	0	0	0
ENSG00000136872	ALDOB	2	0	0	0	0	0	3	3	0	0	0	1
ENSG00000109107	ALDOC	12	16	14	29	16	32	1	3	0	3	2	2
ENSG00000033011	ALG1	302	301	281	331	345	313	292	300	402	232	214	254
ENSG00000139133	ALG10	3	3	4	4	2	3	3	4	6	1	2	1
ENSG00000175548	ALG10B	4	2	2	0	4	4	5	7	5	0	2	3
ENSG00000253710	ALG11	5	6	3	6	6	5	6	10	8	3	2	3
ENSG00000182858	ALG12	24	21	31	16	14	13	24	11	11	8	7	7
ENSG00000101901	ALG13	16	3	12	10	10	6	30	18	31	17	16	26
ENSG00000172339	ALG14	7	5	8	3	3	0	8	5	7	1	1	1
ENSG00000189366	ALG1L	49	39	36	24	21	15	34	45	56	29	36	26
ENSG00000254016	ALG1L10P	0	0	1	0	0	0	0	0	0	0	0	0
ENSG00000249889	ALG1L11P	1	2	0	0	1	0	0	0	0	0	0	0
ENSG00000250794	ALG1L12P	0	1	0	0	0	0	0	0	0	0	0	0
ENSG00000253981	ALG1L13P	3	2	11	7	1	5	5	2	3	1	1	0
ENSG00000242017	ALG1L15P	0	0	0	0	0	0	4	0	0	0	0	0
ENSG00000251287	ALG1L2	0	0	2	0	0	0	5	5	3	3	0	1
ENSG00000238278	ALG1L6P	3	2	0	1	0	4	0	0	0	0	0	0
ENSG00000251271	ALG1L7P	0	0	0	0	0	0	1	1	0	0	0	0
ENSG00000227620	ALG1L8P	0	0	1	0	0	1	0	1	0	1	1	0
ENSG00000254978	ALG1L9P	17	17	22	11	13	13	28	22	25	9	16	12
ENSG00000119523	ALG2	33	29	35	47	23	31	61	36	45	23	15	20
ENSG00000214160	ALG3	8	11	18	14	6	6	16	16	18	8	10	6
ENSG00000120697	ALG5	75	45	78	61	38	55	30	18	28	15	21	23
ENSG00000088035	ALG6	16	12	26	16	11	13	10	12	16	3	5	5
ENSG00000159063	ALG8	15	10	22	14	13	17	18	17	21	3	6	11
ENSG00000086848	ALG9	14	15	23	21	14	18	8	7	9	4	2	6
ENSG00000258529	ALG9	0	2	5	0	0	0	0	3	0	0	2	0
ENSG00000171094	ALK	5	1	11	4	4	2	9	5	0	1	4	2
ENSG00000100601	ALKBH1	11	6	22	22	5	12	23	15	17	4	4	8
ENSG00000189046	ALKBH2	13	14	27	21	14	19	15	12	9	5	1	3
ENSG00000166199	ALKBH3	15	13	33	25	23	17	17	22	26	6	13	9
ENSG00000244926	ALKBH3-AS1	11	11	5	4	5	2	4	12	8	3	3	7
ENSG00000160993	ALKBH4	6	5	9	11	11	6	20	11	21	5	9	12
ENSG00000091542	ALKBH5	49	49	51	66	45	47	103	100	100	31	46	41
ENSG00000239382	ALKBH6	5	8	11	10	15	13	11	7	8	8	5	5
ENSG00000125652	ALKBH7	11	4	9	5	1	3	17	8	6	11	7	7
ENSG00000137760	ALKBH8	10	18	21	17	12	20	12	15	16	10	0	8
ENSG00000116127	ALMS1	29	37	55	21	30	27	83	61	86	28	50	31
ENSG00000230002	ALMS1-IT1	3	0	3	0	0	1	6	5	3	2	2	3
ENSG00000163016	ALMS1P	0	0	0	0	0	0	0	2	1	2	0	0
ENSG00000108839	ALOX12	15	7	15	17	11	10	11	7	13	6	11	15
ENSG00000179477	ALOX12B	28	16	21	3	6	4	0	0	0	0	0	0
ENSG00000262943	ALOX12P2	0	1	0	1	0	0	4	2	0	0	0	0
ENSG00000012779	ALOX5	9	4	7	2	0	2	3	0	0	0	0	2
ENSG00000132965	ALOX5AP	0	0	1	0	0	0	0	0	0	0	1	0
ENSG00000179148	ALOXE3	2	3	3	15	12	6	8	4	4	3	9	4
ENSG00000073331	ALPK1	22	19	38	19	6	6	26	18	13	5	3	9
ENSG00000198796	ALPK2	0	0	0	1	0	0	0	0	0	0	0	0
ENSG00000136383	ALPK3	0	0	1	0	0	0	1	0	0	0	0	0
ENSG00000163286	ALPPL2	0	0	0	0	0	0	0	1	0	0	0	0
ENSG00000003393	ALS2	41	32	38	66	65	60	57	30	48	24	31	25
ENSG00000178038	ALS2CL	7	4	9	10	5	8	2	1	2	3	2	2
ENSG00000155754	ALS2CR11	4	2	5	1	0	0	3	0	0	0	0	0
ENSG00000155749	ALS2CR12	2	0	3	0	0	0	2	0	3	1	0	0
ENSG00000156150	ALX3	56	53	64	41	55	34	77	92	79	80	80	101
ENSG00000052850	ALX4	3	3	0	1	2	0	1	2	0	2	0	3
ENSG00000183684	ALYREF	48	43	60	87	96	79	106	120	177	100	73	66
ENSG00000242110	AMACR	5	5	16	6	6	4	15	16	11	1	2	7
ENSG00000106927	AMBP	0	0	0	0	0	0	0	0	0	1	0	0
ENSG00000110497	AMBRA1	22	20	39	35	30	31	38	39	42	38	25	42
ENSG00000123505	AMD1	76	59	134	129	105	122	206	199	240	45	76	78
ENSG00000139344	AMDHD1	5	0	5	4	2	0	2	1	0	1	1	0
ENSG00000162066	AMDHD2	25	34	28	40	26	18	6	6	9	8	8	9
ENSG00000184675	AMER1	4	5	6	4	4	5	12	12	19	7	11	12
ENSG00000165566	AMER2	0	0	0	0	1	0	0	0	0	0	0	0
ENSG00000178171	AMER3	0	0	1	0	0	0	0	0	0	0	0	0
ENSG00000159461	AMFR	85	58	99	129	81	91	220	189	228	75	68	72
ENSG00000104899	AMH	1	1	0	0	0	0	6	1	5	0	0	1
ENSG00000160593	AMICA1	0	1	0	0	0	0	0	0	0	0	0	0
ENSG00000181754	AMIGO1	6	7	5	3	7	3	6	2	6	6	3	3
ENSG00000139211	AMIGO2	3	3	7	23	13	20	0	0	0	0	0	0
ENSG00000176020	AMIGO3	46	59	66	51	61	57	56	32	19	36	36	32
ENSG00000101935	AMMECR1	19	20	30	17	19	24	17	18	22	4	10	6
ENSG00000144233	AMMECR1L	21	22	30	40	24	23	86	57	51	20	16	24
ENSG00000166126	AMN	311	282	285	451	375	338	327	297	476	312	314	361
ENSG00000151743	AMN1	21	12	14	9	4	2	9	9	8	10	5	7
ENSG00000126016	AMOT	0	1	3	3	1	1	0	0	0	0	0	0
ENSG00000166025	AMOTL1	45	44	68	66	47	52	37	32	37	9	19	17
ENSG00000114019	AMOTL2	64	62	73	136	100	102	193	226	276	79	65	88
ENSG00000116748	AMPD1	0	0	0	0	0	0	0	0	0	0	1	0
[truncated: 25,422 more rows]
